# Supplementary material for: Reactive oxygen species regulate activity-dependent neuronal plasticity in Drosophila
Source: eLife journal article supplement (doi:10.7554/elife.39393), 2018-12-12
Supplement: supp [file elife-39393-supp-v1.zip]

Archive with 10 entries (10 files):
- elife_poa_e39393_Figure_6_source_data_1.xlsx
- elife_poa_e39393_Figure_3_figure_supplement_2.pdf
- elife_poa_e39393_Figure_5_source_data_1.xlsx
- elife_poa_e39393_Figure_2_source_data_1.xlsx
- elife_poa_e39393_Figure_3_source_data_1.xlsx
- elife_poa_e39393_Figure_1_source_data_1.xlsx
- elife_poa_e39393_Figure_4_source_data_1.xlsx
- elife_poa_e39393_Figure_3_figure_supplement_3.pdf
- elife_poa_e39393_Transparent_Reporting_File.pdf
- elife_poa_e39393_Figure_3_figure_supplement_1.pdf
