# Supplementary material for: Reactive oxygen species regulate activity-dependent neuronal plasticity in Drosophila
Source: eLife journal article supplement (doi:10.7554/elife.39393), 2018-12-12
Supplement: supp [file elife-39393-supp-v1.zip › elife_poa_e39393_Figure_1_source_data_1.xlsx]

## Sheet: Sheet1
Figure 1 Panel C (Bouton Number Quantification)							Figure 1 Panel E (Active Zone Number Quantification)							Figure 1 Panel G (aCC Dendritic Arbor Quantification)
OregonR 25°C	OregonR 29°C	OregonR 32°C	UAS-dTrpA1 25°C	UAS-dTrpA1 27°C			OregonR 25°C	OregonR 29°C	OregonR 32°C	UAS-dTrpA1 25°C	UAS-dTrpA1 27°C			OregonR 25°C	OregonR 27°C	OregonR 29°C	UAS-dTrpA1 25°C	UAS-dTrpA1 27°C	UAS-dTrpA1 29°C
32	34.0883	54.4721	54.2767	60.8149			333	433	195	209	195			843.748	680.795	756.932	545.134	529.683	454.058
29	25.5663	41.1567	80.0581	76.6268			270	329	305	221	179			718.544	927.206	801.716	620.046	454.512	344.915
38	38.8228	44.7882	65.1321	74.1942			364	406	294	239	182			754.834	752.688	783.745	528.374	606.264	532.603
24	34.0883	61.7351	51.5629	91.2224			307	389	318	268	270			790.438	832.628	693.061	576.083	482.949	426.868
38	35.0352	53.2617	61.0613	59.5986			359	388	296	232	194			793.391	917.426	745.476	554.34	665.839	352.386
42	37.8759	48.4197	40.8189	77.8431			349	455	319	280	215			779.768		840.55	547.776		416.656
41	50.1856	71.419	72.4536	59.5986			342	397	273	223	218
36	35.9821	25.4203	56.126	75.4105			311	383	178	225	260
30	26.5132	49.6302	43.8803	63.2475			339	332	237	222	194
22	25.5663	45.9987	63.2693	75.4105			298	292	267	237	245
25	27.4601	31.4728	66.3307	59.5986			302	348	271
34	38.8228	62.9456	45.9213	60.8149			298	380	250
28	32.1945	67.7875	62.2488	71.7616			279		300
36	30.3008	52.0512	82.6583	85.1409
32	38.8228	38.7357	48.9827	96.0876
38	31.2477	50.8407	67.3512	83.9246
26	34.0883	53.2617	56.126	68.1127
29	31.2477	32.6833	65.3102	60.8149
32	32.1945	59.3141	47.9622	82.7083
26	32.1945	49.6302	63.2693	71.7616
36	35.0352	41.1567	69.3921	74.1942
36	35.9821	54.4721	60.2079	90.0061
26	35.9821	33.8938	65.3102	75.4105
29	33.1414	45.9987	48.9827	43.7868
25	37.8759	41.1567	51.0236	76.6268
35	42.6104	50.8407	46.9417	59.5986
31	46.398	56.8931	48.9827	77.8431
31	34.0883	37.5252	38.778	68.1127
21	44.5042	49.6302	36.737	57.166
31	40.7166	48.4197	62.2488	75.4105
26	33.1414	43.5777	48.9827	92.4387
26	29.3539	50.8407	55.1055	79.0594
29	39.7697	31.4728		70.5453
31	38.8228	64.1561		92.4387
26	42.6104	65.3666		57.166
26	43.5573	61.7351		48.6519
27	35.0352	41.1567		59.5986
21	36.929	47.2092		63.2475
25	35.9821	45.9987		100.953
34	35.9821	76.261		51.0846
26	35.9821	55.6826		70.5453
34	33.1414	45.9987		69.329
30	37.8759	48.4197		55.9497
37	42.6104	66.5771		68.1127
42	46.398	56.8931		71.7616
33	34.0883	53.2617		79.0594
16	44.5042	37.5252		85.1409
28	40.7166	60.5246		79.0594
29	33.1414	38.7357		75.4105
20	29.3539	45.9987		70.5453
36	39.7697	56.8931		64.4638
30	38.8228	54.4721		64.4638
38	42.6104	50.8407		60.8149
37	43.5573	47.2092		62.0312
19	35.0352	38.7357		47.4357
33	36.929	52.0512		45.0031
34	35.9821	49.6302		85.1409
	26.5132	31.4728		79.0594
	23.6725	33.8938
	25.5663	45.9987
	28.4069	45.9987
	33.1414	39.9462
	28.4069	67.7875
	26.5132	56.8931
	37.8759	60.5246
	30.3008	53.2617
	33.1414	37.5252
	33.1414	49.6302
	23.6725	31.4728
	33.1414	53.2617
	32.1945	58.1036
	35.0352	62.9456
	34.0883	56.8931
	35.0352	42.3672
	41.6635	50.8407
	22.7256
	30.3008
	25.5663
	29.3539
	30.3008
	35.9821
	41.6635
	42.6104
	34.0883
	31.2477
	36.929
	41.6635
	32.1945
	25.5663
	35.0352
	41.6635
	22.7256
	30.3008
	25.5663
	29.3539
	30.3008
	35.9821
	41.6635
	42.6104
	34.0883
	31.2477
	36.929
	41.6635
	32.1945
	25.5663
	36.929
	27.4601
	35.9821
	34.0883
	32.1945
	41.6635
	28.4069
	23.6725
	35.0352
	30.3008
	33.1414
	26.5132
	29.3539
	38.8228
	34.0883
	27.4601
	37.8759
	36.929
	27.4601
	35.9821
	31.2477
	36.929
	30.3008
	27.4601
	36.929
	25.5663
	23.6725
	37.8759
	36.929
	27.4601
	35.9821
	31.2477
	36.929
	30.3008
	27.4601
	36.929
