# Supplementary material for: Reactive oxygen species regulate activity-dependent neuronal plasticity in Drosophila
Source: eLife journal article supplement (doi:10.7554/elife.39393), 2018-12-12
Supplement: supp [file elife-39393-supp-v1.zip › elife_poa_e39393_Figure_2_source_data_1.xlsx]

## Sheet: Sheet1
Figure 2 Panel A (UAS-mito-roGFP2-Orp1 405nm / 488nm Fluorescence Ratio)											Figure 2 Panel B (Bouton Number Quantification)														Figure 2 Panel C (aCC Dendritic Arbor Quantification)
23°C	25°C	27°C	29°C								Control	UAS-SOD2	UAS-Catalase	UAS-dTrpA1	UAS-SOD2, UAS-dTrpA1	UAS-Catalase, UAS-dTrpA1	UAS-SOD1-RNAi	UAS-SOD2-RNAi	UAS-Catalase-RNAi	UAS-dTrpA1 / +	UAS-SOD2, UAS-dTrpA1 / +	UAS-Catalase, UAS-dTrpA1 / +			Control	UAS-Catalase	UAS-dTrpA1	UAS-Catalase, UAS-dTrpA1
0.992	0.95	1.167	0.981								40	40.2824	37.1088	59.8768	70.3983	38.5322	50.8246	28.0968	52.7847	24.3311	27.5967	32.1641			843.748	804.615	545.134	1003.82
0.831	0.933	1.027	1.144								40	40.2824	38.0603	65.6342	63.9	47.6583	37.3711	47.2537	43.8213	26.2776	31.6851	38.7861			718.544	718.853	620.046	784.666
0.918	0.979	1.152	1.063								34	39.3456	30.4483	51.8165	81.2288	43.6023	34.3814	37.0366	44.8172	29.1973	30.6629	34.0561			754.834	903.93	528.374	872.649
0.836	0.978	0.955	1.19								34	34.6616	38.0603	70.2401	68.2322	52.7283	29.8969	49.8079	44.8172	29.1973	32.7071	35.0021			790.438	706.797	576.083	751.869
0.825	0.944	1.035	1.03								32	36.5352	29.4968	59.8768	75.8136	41.5743	49.3298	42.1452	39.8375	32.117	29.6409	33.1101			793.391	824.485	554.34	709.122
0.868	0.988	1.052	1.084								36	33.7248	26.6422	69.0886	75.8136	54.7563	28.402	47.2537	44.8172	34.0635	27.5967	24.5961			779.768	919.831	547.776	862.013
1.04	0.981	1.011	1.177								23	34.6616	30.4483	59.8768	88.8102	49.6863	40.3608	54.9164	58.7603	22.3846	37.8176	33.1101
0.945	0.934	1.059	0.908								39	31.8512	37.1088	64.4827	76.8966	39.5463	49.3298	34.4824	40.8334	26.2776	36.7955	28.3801
0.932	0.955	1.095	1.334								31	40.2824	27.5938	69.0886	62.817	45.6303	44.8453	40.868	56.7685	26.2776	33.7293	30.2721
0.893	0.892	1.113	1.209								30	33.7248	38.0603	80.6034	71.4814	44.6163	38.8659	37.0366	68.7197	36.01	30.6629	35.9481
1.054	0.956	1.127	1.203								20	25.2936	44.7209	62.1798		38.5322	38.8659	37.0366	74.6953	33.0903	33.7293	26.4881
0.907	1.142	1.228	1.42								37	38.4088	29.4968	67.9371		56.7844	35.8762	57.4706	72.7035	33.0903	32.7071	32.1641
0.886	1.032	1.069	1.521								29	45.9032	29.4968	73.6945		50.7003	37.3711	38.3138	56.7685	28.2241	33.7293	33.1101
0.888	1.116	1.059	1.41								34		45.6724	48.362		53.7423	31.3917	29.3739	56.7685	32.117	32.7071	26.4881
0.892	0.989	1.231	1.371								31		57.0905	57.5739		42.5883	53.8143	57.4706	42.8253	36.01	41.906	22.7041
0.968	0.958	1.416	0.986								27		25.6907	47.2106		42.5883	37.3711	35.7595	41.8294	27.2508	33.7293	32.1641
0.945	1.091	1.118	1.385								31		39.9634	70.2401		40.5603	38.8659	53.6393	43.8213	34.0635	29.6409	35.0021
0.925	0.992	1.236	1.607								35		32.3513	46.0591		48.6723		54.9164	48.801	23.3578	34.7514	27.4341
0.97	1.118	1.191	1.037								29		19.9817	44.9076		43.6023			56.7685	28.2241	35.7734	25.5421
1.166	0.979	1.087	1.267								37		36.1573	54.1194		51.7143			51.7888	28.2241	33.7293	34.0561
0.927		1.183	1.458								29		29.4968	54.1194		57.7984			57.7644	31.1438	37.8176	29.3261
0.862		1.194	1.266								34		28.5453	50.665		45.6303			40.8334	26.2776	36.7955	43.5162
0.815		1.297	1.497								26		28.5453	44.9076		54.7563			69.7156	33.0903	25.5525	35.9481
0.914		1.168	1.425								35		44.7209	46.0591					71.7075	29.1973	28.6188	26.4881
0.937			1.408								32		56.139						46.8091	40.8762	31.6851	29.3261
1.077			1.169								34		29.4968						58.7603	24.3311	32.7071	32.1641
1.022			1.027								30		35.2058						54.7766	20.4381	26.5746	31.2181
0.773			0.992								32		49.4785						48.801	36.9832	34.7514	26.4881
0.819			1.071								32		39.9634							32.117	27.5967	36.8941
0.974			0.958								33		21.8847							35.0368	39.8618	30.2721
0.759			1.025								28									40.8762	33.7293	30.2721
0.829			1.02								29									27.2508	31.6851	31.2181
1.091			0.98																	31.1438	28.6188	31.2181
0.967			0.93																	27.2508	32.7071	30.2721
0.835																				32.117	33.7293	24.5961
0.913																				34.0635	36.7955	24.5961
1.005																				37.9565	35.7734	20.8121
0.867																				30.1705	36.7955	27.4341
0.897																				31.1438	28.6188	23.6501
0.835																				33.0903	37.8176	24.5961
0.969																				28.2241	29.6409	34.0561
0.883																				22.3846	30.6629	27.4341
0.879																				34.0635	34.7514	28.3801
																				32.117	33.7293	32.1641
																				36.01	31.6851	32.1641
																				28.2241	25.5525	30.2721
																				22.3846	30.6629	35.9481
																				28.2241	31.6851	29.3261
																				29.1973	34.7514	30.2721
																				33.0903	33.7293	27.4341
																				37.9565	31.6851	34.0561
																				38.9297	27.5967	25.5421
																				34.0635	36.7955	28.3801
																				37.9565	40.8839	20.8121
																				31.1438	35.7734	27.4341
																				22.3846	26.5746	31.2181
																				36.01	37.8176	32.1641
																					35.7734	29.3261
																					19.4199	24.5961
																					31.6851	31.2181
																					34.7514	25.5421
																					34.7514	33.1101
																					31.6851	41.6242
																					24.5304	27.4341
																					32.7071	30.2721
																					23.5083	31.2181
																					34.7514	29.3261
																					39.8618	34.0561
