# Supplementary material for: Reactive oxygen species regulate activity-dependent neuronal plasticity in Drosophila
Source: eLife journal article supplement (doi:10.7554/elife.39393), 2018-12-12
Supplement: supp [file elife-39393-supp-v1.zip › elife_poa_e39393_Figure_3_source_data_1.xlsx]

## Sheet: Sheet1
Figure 3 Panel A (Bouton Number Quantification)																		Figure 3 Panel B (Active Zone Number Quantification)											Figure 3 Panel C (aCC Dendritic Arbor Quantification)
Control	DJ-1βΔ93	Control + Paraquat	DJ-1βΔ93 + Paraquat	Control + DEM	DJ-1βΔ93 + DEM	UAS-DJ-1βC104A	UAS-DJ-1βC104A + DEM	UAS-DuOx	DJ-1βΔ93, UAS-DuOx	UAS-dTrpA1	DJ-1βΔ93, UAS-dTrpA1	UAS-DJ-1βC104A, UAS-dTrpA1	UAS-DJ-1βC104A / +	UAS-DuOx / +	UAS-DJ-1βC104A, UAS-dTrpA1 / +			OregonR	UAS-Catalase	UAS-DJ-1βC104A	UAS-dTrpA1	UAS-Catalase, UAS-dTrpA1	UAS-DJ-1βC104A, UAS-dTrpA1	UAS-dTrpA1 / +	UAS-Catalase, UAS-dTrpA1 / +	UAS-DJ-1βC104A, UAS-dTrpA1 / +			Control 25°C	Control 29°C	UAS-dTrpA1 29°C	DJ-1βΔ93 / +, UAS-dTrpA1 29°C
41	32.6456	47.4036	30.1378	52.4737	25.4211	26	26	42.7968	51.6929	54.2767	50.8491	47.2373	36.8653	40.1418	28.5029			333	267	389	238	313	314	309	347	272			843.748	756.932	454.058	643.671
35	33.7713	35.5527	26.9087	40.1926	27.7321	32	16	61.5857	36.2757	80.0581	35.2032	37.3505	20.1083	24.4767	44.9469			270	348	382	235	379	349	353	305	388			718.544	801.716	344.915	527.213
28	22.5142	38.7848	27.9851	42.4256	28.8876	33	31	43.8407	39.9033	65.1321	37.1589	43.9417	28.4868	41.1208	37.273			364	293	412	253	329	395	318	331	422			754.834	783.745	532.603	577.783
31	23.6399	37.7074	34.4432	48.0079	25.4211	22	33	63.6733	43.5309	51.5629	36.1811	59.3213	29.3246	39.1627	29.5992			307	317	340	285	323	349	308	318	410			790.438	693.061	426.868	602.627
31	31.5199	37.7074	20.4506	44.6585	24.2656	26	24	52.1913	30.8344	61.0613	38.1368	30.7592	25.9733	39.1627	30.6954			359	384	367	280	296	369	289	325	292			793.391	745.476	352.386
27	19.1371	39.8621	31.2141	49.1243	33.5096	33	29	48.016	38.9964	40.8189	49.8712	38.449	25.9733	30.3511	35.0805			349	217	387	285	354	353	294	298	320			779.768	840.55	416.656
28	19.1371	45.2489	32.2905	56.9396	33.5096	42	46	41.753	35.3688	72.4536	28.3581	49.4344	26.8111	37.2045	35.0805			342	389	382	307	316	326	288	342	298
33	22.5142	48.4809	24.756	40.1926	36.9761	31	28	61.5857	38.0895	56.126	35.2032	50.5329	32.676	26.4348	35.0805			311	323	339	323	328	380	394	278	403
41	24.7656	35.5527	18.298	37.9597	30.0431	32	30	46.9721	46.2515	43.8803	29.336	32.9563	26.8111	21.5395	31.7917			339	291	326	281	311	399	365	384	271
33	21.3885	36.63	30.1378	48.0079	35.8206	23	34	54.2789	30.8344	63.2693	30.3139	34.0548	31.8382	29.372	37.273			298	364	373	260	322	398		331
43	21.3885	44.1715	31.2141	43.542	36.9761	29	24	40.7092	50.786	66.3307	47.148	35.1534	28.4868	44.058	48.2357			302	314	391	238	322	349
26	25.8913	38.7848	33.3668	52.4737	42.7536	27	29	39.6654	44.4378	45.9213	35.361	52.73	25.1354	28.3929	44.9469			298	296		300
40	38.2741		33.3668	41.3091	32.3541	25	34	56.3666	50.786	62.2488	42.2368	29.6607	34.3517	33.2883	41.6581			279
24	21.3885		39.8249	41.7915	34.6651	27	32	56.3666		82.6583	41.2545	42.8432	26.8111	26.4348	25.2141
42	30.3942		27.9851	49.39	33.5096	26	26	60.5419		48.9827	51.077	47.2373	26.8111	22.5185	32.8879
23	38.2741		38.7486	29.1274	34.6651	27	27	63.6733		67.3512	28.4853	59.3213	25.1354	27.4139	42.7543
30	39.3998		30.1378	31.6603	21.9545	32	35	69.9363		56.126	42.2368	34.0548	25.9733	35.2464	32.8879
31	28.1427		27.9851	41.7915	33.5096	42	38			65.3102	27.503	58.2227	20.1083	37.2045	37.273
30	32.6456		38.7486	26.5946	33.5096	28	29			47.9622	48.1303	40.6461	23.4597	34.2673	38.3693
41	29.2685		21.527	55.7221	24.2656	31	27			63.2693	52.0593	30.7592	26.8111	31.3301	42.7543
34	40.5255		30.1378	48.1236	35.8206	24	34			69.3921	33.3965	46.1388	36.0274	24.4767	39.4655
35	40.5255		31.2141	56.9885	34.6651	25	22			60.2079	33.3965	34.0548	31.0003	35.2464	29.5992
31	32.6456		23.6797	50.6564	28.8876	27	31			65.3102	61.8818	58.2227	26.8111	29.372	31.7917
26	20.2628		30.1378	46.8572	24.2656	30	28			48.9827	57.9528	47.2373	21.784	32.3092	30.6954
32	32.6456		19.3743	41.7915	35.8206	30	32			51.0236	30.4498	41.7446	35.1896	44.058	30.6954
27			38.7486	48.1236	32.3541	27	31			46.9417	35.361	40.6461	31.8382	31.3301	36.1767
27			34.4432	35.4595	28.8876	35	36			48.9827	39.29	43.9417	31.8382	36.2255	36.1767
25			34.4432	45.5908	33.5096	21	33			38.778	47.148	41.7446	25.1354	32.3092	38.3693
41			38.7486	39.2587	31.1986	24	28			36.737	36.3432	35.1534	31.8382	45.0371	37.273
35			33.3668	36.7259	31.1986	31	42			62.2488	41.2545	51.6315	21.784	31.3301	27.4066
25				31.6603	33.5096	29	15			48.9827	41.2545	46.1388	30.1625	30.3511	49.3319
31				30.3938	33.5096	27	29			55.1055	47.148	35.1534	31.8382	29.372	35.0805
33				49.39	25.4211	23	36				43.219	32.9563	35.1896	32.3092	31.7917
26				54.4556	23.1101	23	33				38.3078	50.5329	28.4868	26.4348	31.7917
22				63.3205	17.3325	33	25				35.361	41.7446	26.8111	30.3511	32.8879
30				44.3244	33.5096	27	25				40.2723	40.6461	23.4597	29.372	42.7543
42				55.7221	39.2871	28	28				43.219	40.6461	26.8111	33.2883	32.8879
31					30.0431	22	38					41.7446	21.784	32.3092	31.7917
26					28.8876	31	38					43.9417	30.1625	35.2464	29.5992
27					42.7536	22	29						26.8111	22.5185	29.5992
27					32.3541	31	29						21.784	38.1836	35.0805
29						32	36						24.2976	47.9743	40.5618
						33	29						20.9462	36.2255	32.8879
						31	25						26.8111	30.3511	31.7917
						16	27						21.784	38.1836	30.6954
						19	27						20.9462	31.3301	30.6954
						24	31						33.5139	35.2464	41.6581
						27	29						28.4868	39.1627	43.8506
						25	25						25.9733	33.2883	33.9842
						28	28						21.784	26.4348	24.1178
													23.4597	24.4767	36.1767
													22.6219	23.4976	40.5618
													24.2976	25.4557	31.7917
													27.6489	24.4767	32.8879
													25.1354	22.5185	30.6954
													30.1625	34.2673	30.6954
													21.784	34.2673	21.9253
													21.784	26.4348	38.3693
													21.784	40.1418	36.1767
													21.784	20.5604	33.9842
													32.676		41.6581
															33.9842
															28.5029
															26.3104
															47.1394
