# Supplementary material for: Reactive oxygen species regulate activity-dependent neuronal plasticity in Drosophila
Source: eLife journal article supplement (doi:10.7554/elife.39393), 2018-12-12
Supplement: supp [file elife-39393-supp-v1.zip › elife_poa_e39393_Figure_4_source_data_1.xlsx]

## Sheet: Sheet1
Figure 4 Panel A (Bouton Number Quantification)																						Figure 4 Panel B (Bouton Number Quantification)
																						Control	Control + DEM	UAS-PTEN-RNAi + DEM	UAS-PI3KDN + DEM	UAS-dTrpA1	UAS-PI3KDN, UAS-dTrpA1	UAS-PTEN, UAS-dTrpA1	UAS-PTEN-RNAi	UAS-PI3KDN	UAS-PTEN	UAS-PTEN-RNAi / +	UAS-PTEN / +
	OregonR	OregonR	OregonR	OregonR		DJ-1β93 / +	DJ-1β93 / +	DJ-1β93 / +	DJ-1β93 / +		PTENCO76 / +	PTENCO76 / +	PTENCO76 / +	PTENCO76 / +		PTENCO76 / +; DJ-1β93 / +	PTENCO76 / +; DJ-1β93 / +	PTENCO76 / +; DJ-1β93 / +	PTENCO76 / +; DJ-1β93 / +
[DEM] mM	0	5	10	15		0	5	10	15		0	5	10	15		0	5	10	15			29	41.7915	67.9742	40.7371	42.6046	30.9813	27.8333	42.2082	32.4965	35.0077	31.0428	34.3533
																						34	49.39	71.6988	30.8012	55.2709	45.8983	36.7399	49.3926	40.3744	20.5218	42.2182	28.1874
																						26	29.1274	41.9019	34.7755	57.5739	41.3085	42.3066	47.5965	32.4965	30.1791	48.4268	34.3533
	47	46.6013	41.7915	25.6347		42.6154	24.775	30.6115	40.0825		30.2841	67.0922	48.4443	40.7402		35.8329	23.3001	29.205	38.3545			33	31.6603	51.2135	26.8268	51.8165	37.8661	31.1733	41.3102	35.4507	27.7647	53.3936	30.8299
	32	53.0737	49.39	22.2168		35.5129	27.7479	25.5096	30.761		32.3726	60.9929	43.0616	36.7655		44.5491	26.0962	24.3375	43.8337			34	41.7915	72.63	35.7691	55.2709	30.9813	35.6266	44.9023	32.4965	20.5218	34.7679	22.9022
	29	36.2454	29.1274	36.7431		31.4542	33.6939	24.4892	33.5575		42.8154	68.312	38.7554	38.7529		38.7383	31.6882	23.364	55.888			45	26.5946	54.0069	40.7371	56.4224	35.5712	28.9466	47.5965	31.5118	27.7647	32.2845	22.9022
	38	41.4233	31.6603	28.1982		21.3077	28.7389	36.7338	34.4896		51.1696	43.9149	62.4393	37.7592		34.8645	27.0282	35.0461	58.0797			34	55.7221	59.5939	35.7691	43.7561	47.0457	36.7399	47.5965	35.4507	32.5934	42.2182	27.3065
	24	46.6013	41.7915	36.7431		23.337	18.829	36.7338	25.1681		31.3283	54.8936	47.3678	47.6958		37.7698	17.7081	35.0461	33.9711			30	48.1236	51.2135	39.7435	43.7561	40.161	35.6266	32.3297	28.5575	27.7647	44.7017	30.8299
	38	50.4847	26.5946	37.5976		42.6154	29.7299	32.6522	38.2182		42.8154	58.5532	48.4443	46.7022		39.7068	27.9602	31.152	50.4088			31	56.9885	52.1446	21.8589	61.0283	35.5712	37.8533	38.616	30.527		44.7017	28.1874
	42	41.4233	55.722	24.7802		39.5715	23.784	46.9376	22.3716		29.2398	56.1134	57.0566	33.7845		35.8329	22.3681	44.7811	37.2587			34	50.6564	67.9742	30.8012	42.6046	47.0457	32.2866	46.6984	33.4812		43.4599	24.6639
	41	34.9509	48.1236	30.7617		46.674	36.6669	19.3873	28.8967		41.7711	48.7943	39.832	32.7909		40.6752	34.4842	18.4965	33.9711			38	46.8572	43.7642	23.8461	73.6945	42.4559	36.7399	44.9023	42.3439		49.6685	30.8299
	36	27.1841	56.9885	27.3437		27.3956	21.802	35.7134	33.5575		45.9482	69.5319	52.7505	45.7085		33.896	20.5041	34.0725	31.7794			44	41.7915	54.9381	28.814	50.665	52.783	35.6266	39.5141	28.5575		47.1851	26.4257
	30	16.8282	50.6564	38.4521		37.5422	27.7479	31.6319	33.5575		32.3726	59.773	50.5974	24.8416		35.8329	26.0962	30.1785	41.642			35	48.1236	80.0792	31.7948	59.8768	48.1932	26.72	35.9219	45.2981		45.9434	22.9022
	22	29.773	46.8572	35.0341		37.5422	27.7479	21.428	24.2359		35.5055	59.773	57.0566	37.7592		38.7383	26.0962	20.4435	33.9711			27	35.4595	54.9381	31.7948	57.5739	55.078	37.8533	28.7375	41.3592		44.7017	22.9022
	25	42.7178	41.7915	33.3252		40.5861	37.6579	25.5096	36.3539		35.5055	34.156	55.9801	46.7022		28.0853	35.4162	24.3375	21.9169			34	45.5908	55.8692		46.0591	48.1932	32.2866	49.3926	38.4049		39.7348	29.9491
	34	44.0123	48.1236	28.1982		43.6301	31.7119	19.3873	36.3539		36.5497	74.4113	47.3678	37.7592		32.9276	29.8242	18.4965	36.1628			30	39.2587	57.7315		52.9679	41.3085	36.7399	39.5141	26.588		42.2182	32.5916
	28	38.8344	35.4595	22.2168		30.4396	33.6939	22.4484	27.9646		34.4612	54.8936	44.1381	42.7275		29.0537	31.6882	21.417	33.9711			28	36.7259	71.6988		57.5739	29.8339	27.8333	40.4121	34.466		40.9765	33.4725
	36	45.3068	45.5908	34.1796		26.381	23.784	35.7134	20.5073		35.5055	64.6524	48.4443	55.6451		43.5806	22.3681	34.0725	35.067			46	31.6603	54.9381		46.0591	34.4237	37.8533	50.2906	24.6186		36.0097	39.6385
	32	36.2454	39.2587	35.0341		35.5129	30.7209	29.5911	28.8967		40.7268	84.1702	39.832	29.8099		43.5806	28.8922	28.2315	26.3002			31	30.3938	57.7315		44.9076	40.161	36.7399	48.4945	33.4812		27.3177	29.9491
	38	37.5399	36.7259	32.4707		38.5568	32.7029	25.5096	28.8967		51.1696	60.9929	52.7505	26.8289		35.8329	30.7562	24.3375	30.6836			36	49.39	48.42		73.6945	49.3407	28.9466	34.1258	25.6033		39.7348	27.3065
	26	49.1902	31.6603	38.4521		35.5129	21.802	35.7134	27.9646		36.5497	37.8156	50.5974	43.7212		26.1484	20.5041	34.0725	29.5878			30	54.4556	51.2135		41.4532	47.0457	35.6266	45.8004			32.2845	34.3533
	29	46.6013	30.3938	38.4521		41.6008	31.7119	29.5911	28.8967		33.4169	60.9929	43.0616	36.7655		34.8645	29.8242	28.2315	32.8753			26	63.3205	52.1446		49.5135	37.8661	26.72	44.9023			40.9765	30.8299
	32	33.6565	49.39	26.4892		34.4982	20.811	16.3261	27.9646		34.4612	80.5106	47.3678	44.7148		29.0537	19.5721	15.576	33.9711			33	44.3244	42.8331		44.9076	36.7186	36.7399	35.0238			44.7017	29.0682
	26	49.1902	54.4556	16.2353		37.5422	25.7659	26.5299	29.8289		39.6826	60.9929	41.9851	46.7022		21.3061	24.2321	25.311	41.642			28	55.7221	52.1446		43.7561	40.161	42.3066				49.6685	28.1874
	36	41.4233	63.3205	24.7802		34.4982	20.811	29.5911	16.7787		46.9925	57.3333	46.2912	44.7148		34.8645	19.5721	28.2315	36.1628			36	41.7915	64.2496		64.4827	49.3407	40.0799				29.8011	29.0682
	36	27.1841	44.3244	30.7617		42.6154	19.82	25.5096	36.3539		27.1512	64.6524	55.9801	28.8162		39.7068	18.6401	24.3375	48.2171				49.39			48.362	44.7508	38.9666				33.5262	29.9491
	26	34.9509	55.722	19.6533		41.6008	29.7299	27.5503	34.4896		27.1512	75.6312	51.6739	46.7022		41.6437	27.9602	26.2845	31.7794				53.1892			46.0591	32.1288	37.8533				44.7017	25.5448
	29	56.9571	41.7915	20.5078		36.5275	27.7479	24.4892	36.3539		42.8154	51.234	60.2862	34.7782		41.6437	26.0962	23.364	30.6836				37.9923				45.8983	37.8533				38.4931	32.5916
	25	37.5399	49.39	39.3066		20.2931	17.838	27.5503	33.5575		38.6383	60.9929	39.832	38.7529		37.7698	16.7761	26.2845	39.4503				29.1274				44.7508	37.8533				24.8343	29.0682
	35	31.0675	53.1892	35.8886		24.3517	22.793	35.7134	20.5073		42.8154	51.234	45.2147	42.7275		15.4953	21.4361	34.0725	44.9296				53.1892				49.3407	37.8533				36.0097	37.8768
	31	32.362	37.9923	25.6347		27.3956	30.7209	48.9784	25.1681		31.3283	51.234	41.9851	59.6198		47.4544	28.8922	46.7281	39.4503				55.7221				28.6864	43.4199				34.7679	26.4257
	31	38.8344	29.1274	26.4892		42.6154	18.829	39.7949	26.1002		45.9482	46.3546	54.9035	32.7909		46.486	17.7081	37.9666	39.4503				39.2587				35.5712	32.2866				38.4931	24.6639
	21	34.9509	53.1892	33.3252		45.6594	20.811	24.4892	23.3038		38.6383	47.5744	54.9035	47.6958		28.0853	19.5721	23.364	31.7794				46.8572				44.7508	32.2866				43.4599	25.5448
	31	29.773	55.722	27.3437		34.4982	33.6939	27.5503	28.8967		45.9482	63.4326	46.2912	27.8226		30.9906	31.6882	26.2845	40.5462				45.5908				29.8339	46.7599				49.6685	23.7831
	26	49.1902	39.2587	29.9072		44.6447	30.7209	28.5707	36.3539		33.4169	65.8723	47.3678	23.8479		31.9591	28.8922	27.258	33.9711				51.9228				44.7508	48.9866				47.1851	33.4725
	26	32.362	46.8572	26.4892		36.5275	39.6399	28.5707	26.1002		36.5497	37.8156	61.3628	48.6895		30.0222	37.2802	27.258	23.0127				56.9885				45.8983	26.72				34.7679	22.0214
	29	31.0675	45.5908	27.3437		36.5275	42.6129	18.3669	37.2861		50.1253	58.5532	37.6789	41.7338		29.0537	40.0762	17.523	46.0254				48.1236				44.7508	35.6266				38.4931	25.5448
	31	36.2454	51.9228	30.7617		18.2638	28.7389	23.4688	25.1681		39.6826	53.6737	58.1332	31.7972		39.7068	27.0282	22.3905	43.8337				43.0579				33.2763	33.3999				38.4931	33.4725
	26	36.2454	56.9885	29.9072		30.4396	20.811	23.4688	37.2861		43.8597	64.6524	46.2912	38.7529		28.0853	19.5721	22.3905	42.7379				36.7259				43.6034	33.3999				39.7348	34.3533
	26	46.6013	48.1236	42.7246		34.4982	35.6759	21.428	52.2005		36.5497	56.1134	41.9851	44.7148		31.9591	33.5522	20.4435	41.642				45.5908				47.0457	30.0599				42.2182	28.1874
	27	32.362	43.0579	29.0527		25.3663	27.7479	31.6319	20.5073		37.594	56.1134	64.5924	64.5881		36.8014	26.0962	30.1785	32.8753				39.2587				47.0457	42.3066				37.2514	29.0682
	21	34.9509	36.7259	29.0527		28.4103	17.838	30.6115	27.9646		49.0811	84.1702		21.8606		29.0537	16.7761	29.205	27.3961				37.9923				48.1932	34.5133				45.9434	29.9491
	25	54.3681	45.5908	30.7617		29.4249	26.7569	32.6522	26.1002		38.6383	69.5319		35.7719		31.9591	25.1641	31.152	30.6836				37.9923				48.1932	34.5133				28.5594	31.7108
	34	42.7178	39.2587	41.0156		45.6594	29.7299	43.8764	41.9468		38.6383	78.0709		37.7592		36.8014	27.9602	41.8606	40.5462				44.3244									34.7679	33.4725
	26	33.6565	37.9923	32.4707		37.5422	17.838	32.6522	27.0324		54.3025	62.2127		31.7972		22.2745	16.7761	31.152	51.5046				29.1274									37.2514	25.5448
	34	37.5399	37.9923	52.124		29.4249	22.793	27.5503	29.8289		48.0368	53.6737		40.7402		37.7698	21.4361	26.2845	41.642				36.7259									33.5262	31.7108
	30	38.8344	44.3244	40.1611		28.4103	19.82	35.7134	27.0324		48.0368	79.2907		42.7275		27.1168	18.6401	34.0725	27.3961				30.3938									29.8011	24.6639
	45	47.8957	29.1274	46.1425		50.7326	31.7119	31.6319	33.5575		38.6383	51.234		50.6768		37.7698	29.8242	30.1785	42.7379				63.3205									33.5262	24.6639
	37	67.3129	36.7259	35.8886		25.3663	35.6759	16.3261	38.2182		42.8154	70.7517		31.7972		30.0222	33.5522	15.576	38.3545				45.5908									27.3177	22.0214
	42	56.9571	30.3938	30.7617		29.4249	32.7029	38.7745	21.4395		40.7268	40.2553		55.6451		40.6752	30.7562	36.9931	29.5878				48.1236									39.7348	27.3065
	33	47.8957	86.1159	32.4707		21.3077	50.5409	39.7949	31.6932		40.7268	57.3333		45.7085		39.7068	47.5323	37.9666	38.3545				51.9228									32.2845	26.4257
	16	33.6565	63.3205	33.3252		46.674	38.6489	45.9172	37.2861		43.8597	47.5744		64.5881		43.5806	36.3482	43.8076	30.6836				43.0579									42.2182	22.9022
	28	47.8957	45.5908	32.4707		35.5129	29.7299	39.7949	40.0825			51.234		44.7148		29.0537	27.9602	37.9666	37.2587				58.2549									33.5262	26.4257
	29		48.1236			51.7473	30.7209	23.4688	31.6932			70.7517		43.7212		29.0537	28.8922	22.3905	38.3545				64.5869									44.7017	25.5448
	20		51.9228			36.5275	35.6759	31.6319	35.4218			67.0922		41.7338			33.5522	30.1785	40.5462				58.2549									27.3177	20.2597
	36		43.0579			32.4689	29.7299	16.3261	28.8967			65.8723		45.7085			27.9602	15.576					43.0579									38.4931	29.0682
	30		58.2549			34.4982	36.6669	32.6522	26.1002			63.4326		26.8289			34.4842	31.152					41.7915									34.7679	22.9022
	38		64.5869			38.5568	25.7659	26.5299	30.761			63.4326		35.7719			24.2321	25.311					46.8572									32.2845	33.4725
	37		58.2549			29.4249	28.7389	29.5911	41.9468			67.0922		37.7592			27.0282	28.2315					31.6603									38.4931	28.1874
	19		43.0579			35.5129		33.6726	34.4896			78.0709		58.6261				32.1255					41.7915									22.3508	35.2342
	33		41.7915			36.5275		31.6319	27.0324			50.0142						30.1785					56.9885									29.8011	28.1874
	34		46.8572					35.7134	21.4395			75.6312						34.0725					36.7259									33.5262	22.0214
			31.6603					35.7134	40.0825			70.7517						34.0725														39.7348	26.4257
			41.7915					32.6522	24.2359			65.8723						31.152														40.9765
			56.9885					36.7338	35.4218									35.0461														31.0428
			36.7259					26.5299	25.1681									25.311														33.5262
																																38.4931
																																26.076
																																39.7348
																																33.5262
																																33.5262
