# Supplementary material for: Reactive oxygen species regulate activity-dependent neuronal plasticity in Drosophila
Source: eLife journal article supplement (doi:10.7554/elife.39393), 2018-12-12
Supplement: supp [file elife-39393-supp-v1.zip › elife_poa_e39393_Figure_5_source_data_1.xlsx]

## Sheet: Sheet1
Figure 5 Panel A (eEJP Quantification)												Figure 5 Panel B (mEPSP Quantification)												Figure 5 Panel C (Quantal Content)
OR 25deg	UAS-dTrpA1 25deg	UAS-Catalase, UAS-dTrpA1 25deg	UAS-DJ1bC104A, UAS-dTrpA1 25deg	UAS-Catalase 25deg	UAS-DJ1bC104A 25deg	OR 27deg	UAS-dTrpA1 27deg	UAS-Catalase, UAS-dTrpA1 27deg	UAS-DJ1bC104A, UAS-dTrpA1 27deg			OR 25deg	UAS-dTrpA1 25deg	UAS-Catalase, UAS-dTrpA1 25deg	UAS-DJ1bC104A, UAS-dTrpA1 25deg	UAS-Catalase 25deg	UAS-DJ1bC104A 25deg	OR 27deg	UAS-dTrpA1 27deg	UAS-Catalase, UAS-dTrpA1 27deg	UAS-DJ1bC104A, UAS-dTrpA1 27deg			OR 25deg	UAS-dTrpA1 25deg	UAS-Catalase, UAS-dTrpA1 25deg	UAS-DJ1bC104A, UAS-dTrpA1 25deg	UAS-Catalase 25deg	UAS-DJ1bC104A 25deg	OR 27deg	UAS-dTrpA1 27deg	UAS-Catalase, UAS-dTrpA1 27deg	UAS-DJ1bC104A, UAS-dTrpA1 27deg
18.43	8.81	7.79	16.9	7.75	19.37	16.09	20.1	9.19	12.89			0.976562	0.823975	0.976562	0.854492	1.2207	0.915527	0.671387	0.549316	0.518799	0.88501			17.14	9.84	8.99	17.49	7.2	19.1	18.06	25	11.29	12.5
21.56	19.08	4.51	17.8	9.33	19.66	14.25	18.14	14.42	21.43			0.518799	0.732422	0.823975	0.762939	1.34277	0.762939	0.640869	0.579834	0.793457	0.976562			21.56	8.89	5.27	15.99	24.7	19.97	12.32	23.16	18.26	30.78
18.46	22.04	10.59	13.16	11.46	12.74	14.52	21.54	7.54	14.86			0.946045	0.701904	1.06811	0.823975	1.37329	1.06811	0.976562	0.946045	0.549316	0.732422			13.02	27.59	11.73	14.66	10.47	14.53	15.04	24	10	22.12
14.02	5.75	7.79	8.69	18.25	11.21	14.7	14.56	7.38	17.48			0.793457	0.671387	0.762939	0.549316	1.06811	1.0376	1.00708	0.671387	0.549316	0.793457			21.33	6.14	10.15	9.2	22.19	12.25	15.39	21.27	8.89	16.5
20.62	21.03	8.63	8.91	18.22	13.43	9.95	14.66	8.3	21.39			0.579834	1.15967	0.88501	1.15967	1.52588	1.15967	0.762939	0.518799	0.579834	1.0376			16.35	19.2	8.67	9.98	16.57	13.73	12.54	23.4	9.82	19.75
16.57	6.55	10.73	15.6	14.29	12.74	9.46	17.9	11.41	21.42			1.0376	0.762939	1.31226	1.12915	1.58691	0.915527	1.28174	0.701904	0.701904	1.06811			11.47	7.22	10.61	17.8	10.25	14.64	23.17	22.36	12.16	18.78
12.31	12.21			10.54		16.12	22.11	7.11	10.45			0.88501	0.915527	0.610352	0.610352	0.793457	1.0376	1.12915	0.671387	0.640869	1.28174			8.88	12.47			14.02			29.06	8.27
9.45	19.62					19.56						1.00708	0.762939	0.640869	0.640869	1.09863	0.793457	0.701904	0.854492	0.640869	1.25122			10.17	22.08
9.04	22.47											1.15967	0.610352	0.762939	0.610352	0.762939	0.793457	0.640869	0.976562	0.579834	0.762939				24.81
	11.87											0.579834	1.09863	0.88501	0.823975	0.732422	0.793457	0.701904	0.640869	0.518799	1.19019				16.18
												1.0376	0.671387	1.0376	1.09863	0.793457	0.915527	0.793457	0.854492	0.701904	1.00708
												0.946045	0.793457	0.518799	1.12915	1.28174	1.2207	0.88501	0.610352	0.762939	0.915527
												1.06811	0.88501	0.946045	0.701904	0.671387	0.976562	1.09863	0.854492	0.610352	1.40381
												1.09863	0.701904	0.610352	1.06811	0.793457	0.823975	1.09863	1.00708	0.701904	0.976562
												0.976562	1.09863	0.946045	1.12915	0.549316	0.976562	1.12915	0.732422	0.671387	1.34277
												0.976562	0.915527	0.640869	0.915527	0.640869	0.976562	0.579834	0.762939	0.732422	0.88501
												0.732422	1.19019	0.610352	1.06811	1.58691	0.915527	0.701904	1.34277	0.701904	0.793457
												0.732422	0.854492	0.793457	1.15967	0.549316	1.12915	1.00708	0.579834	0.701904	1.00708
												0.793457	0.915527	0.946045	0.946045	0.762939	0.823975	0.671387	0.701904	0.640869	1.25122
												0.854492	1.31226	1.0376	0.946045	0.732422	1.0376	0.946045	0.762939	0.762939	1.31226
												1.2207	0.549316	0.854492	0.579834	0.640869	1.12915	0.823975	0.976562	0.823975	1.28174
												0.640869	0.762939	0.88501	1.52588	1.2207	1.00708	0.579834	0.579834	0.579834	1.06811
												0.732422	0.88501	0.671387	0.946045	1.12915	1.43433	0.549316	0.823975	0.671387	1.12915
												0.610352	0.793457	0.671387	0.640869	1.40381	1.37329	1.06811	0.640869	0.579834	1.2207
												0.762939	0.762939	0.793457	0.762939	0.640869	1.31226	0.610352	1.15967	1.00708	1.31226
												1.28174	0.701904	0.610352	1.12915	0.854492	0.915527	0.671387	0.579834	0.946045	1.06811
												1.40381	0.88501	0.579834	0.854492	1.09863	1.2207	1.0376	0.732422	0.671387	0.88501
												1.09863	1.09863	0.915527	1.2207	0.640869	1.12915	0.793457	1.00708	0.640869	0.854492
												1.15967	0.823975	0.701904	0.671387	1.64795	0.793457	1.12915	0.610352	0.732422	0.579834
												0.823975	0.793457	0.640869	1.09863	0.793457	0.88501	0.671387	0.518799	0.976562	0.88501
												0.946045	0.854492	0.762939	1.19019	0.946045	1.06811	0.823975	0.732422	0.946045	0.793457
												0.640869	0.793457	0.854492	1.25122	1.31226	0.854492	1.06811	0.823975	0.671387	1.15967
												0.610352	1.31226	0.793457	0.976562	0.640869	0.915527	0.915527	0.88501	0.762939	1.0376
												0.762939	0.732422	0.823975	0.946045	1.09863	1.31226	0.915527	0.640869	0.518799	0.854492
												0.793457	0.976562	0.549316	0.671387	1.19019	1.40381	0.823975	0.579834	0.701904	0.854492
												1.15967	1.06811	0.762939	0.640869	1.2207	1.37329	0.671387	1.06811	0.701904	1.31226
												1.12915	1.31226	0.976562	0.732422	0.823975	0.732422	1.2207	0.823975	0.640869	0.732422
												1.52588	0.610352	0.579834	1.37329	0.946045	1.25122	1.40381	0.549316	0.518799	0.701904
												0.518799	0.762939	0.610352	1.15967	1.09863	1.0376	1.0376	0.732422	0.671387	1.19019
												1.28174	0.640869	0.793457	1.00708	0.976562	0.793457	0.640869	1.00708	1.12915	1.0376
												1.40381	0.762939	0.732422	0.701904	0.610352	0.793457	0.793457	1.00708	0.823975	0.915527
												0.854492	0.732422	1.06811	1.25122	0.762939	0.671387	0.915527	0.793457	0.732422	1.09863
												0.88501	0.701904	0.976562	1.15967	1.0376	1.46484	1.15967	0.762939	0.732422	0.793457
												0.946045	1.00708	0.946045	1.40381	1.09863	0.701904	1.28174	0.915527	0.701904	0.823975
												0.732422	0.823975	0.640869	1.40381	1.15967	0.793457	0.579834	0.88501	0.640869	1.2207
												0.732422	0.793457	0.640869	0.854492	1.15967	0.915527	1.06811	0.610352	0.915527	1.12915
												0.88501	0.88501	0.579834	0.793457	0.762939	0.976562	1.09863	0.701904	0.915527	1.2207
												0.579834	1.19019	0.88501	0.732422	1.34277	0.854492	1.06811	0.762939	0.671387	0.579834
												0.610352	1.46484	0.88501	1.34277	0.946045	1.19019	0.762939	0.610352	0.946045	0.854492
												0.915527	0.976562	0.671387	1.2207	0.823975	0.854492	0.854492	1.2207	0.854492	1.09863
												1.2207	0.88501	0.640869	0.793457	0.762939	0.976562	1.19019	0.671387	0.793457	0.976562
												0.88501	0.793457	0.823975	0.701904	0.915527	1.12915	0.732422	0.976562	0.793457	0.854492
												0.946045	0.793457	1.06811	1.15967	1.2207	0.915527	0.915527	0.701904	0.549316	1.28174
												0.701904	1.37329	1.00708	0.640869	1.15967	0.732422	0.640869	0.640869	0.701904	1.37329
												0.762939	1.06811	0.671387	1.12915	0.762939	0.793457	1.2207	0.732422	0.732422	0.823975
												0.671387	1.0376	0.518799	0.976562	0.915527	1.15967	1.31226	0.732422	0.762939	0.793457
												0.88501	0.610352	0.732422	0.610352	0.946045	1.0376	1.37329	0.854492	0.701904	1.06811
												0.701904	0.701904	0.610352	1.00708	1.15967	0.976562	0.976562	0.610352	0.671387	0.549316
												0.610352	0.854492	0.610352	1.40381	1.09863	1.2207	0.732422	1.0376	0.915527	0.732422
												0.640869	1.31226	0.549316	1.00708	1.43433	1.0376	0.701904	0.671387	0.671387	0.88501
												0.88501	0.976562	0.793457	1.12915	0.854492	1.15967	1.49536	0.823975	0.701904	1.25122
												0.793457	1.12915	0.732422	1.00708	0.976562	1.09863	0.946045	0.976562	0.915527	0.976562
												0.946045	0.732422	0.701904	1.25122	1.06811	1.06811	1.25122	0.701904	0.640869	0.915527
												0.671387	0.823975	0.946045	1.31226	1.09863	1.00708	0.915527	0.610352	0.793457	1.2207
												0.640869	0.915527	1.00708	1.89209	1.28174	0.762939	1.06811	0.610352	1.09863	1.28174
												0.915527	0.946045	0.518799	1.67847	0.701904	0.762939	0.88501	0.732422	0.701904	1.46484
												0.88501	0.701904	1.12915	1.28174	0.640869	0.579834	0.640869	0.762939	0.762939	0.671387
												0.976562	1.00708	0.701904	1.34277	0.732422	1.31226	0.823975	1.00708	0.732422	0.610352
												1.40381	1.19019	0.88501	1.34277	0.976562	0.762939	0.610352	0.640869	0.823975	1.0376
												0.823975	0.671387	0.701904	1.49536	1.06811	1.09863	1.25122	0.854492	0.946045	0.732422
												0.823975	0.915527	0.915527	1.58691	1.40381	1.25122	0.579834	0.640869	0.671387	0.549316
												1.00708	0.823975	0.701904	1.58691	0.88501	1.15967	0.762939	0.793457	0.854492	0.946045
												1.09863	0.793457	0.823975	1.0376	1.00708	1.15967	0.823975	0.976562	0.915527	0.854492
												1.06811	0.640869	0.915527	1.09863	0.946045	1.2207	0.976562	0.854492	0.88501	0.732422
												0.671387	0.732422	1.0376	0.762939	0.793457	0.854492	0.823975	0.976562	0.854492	1.0376
												0.732422	0.732422	1.0376	1.25122	0.793457	0.976562	0.640869	1.00708	0.671387	1.00708
												0.854492	1.70898	0.671387	1.00708	0.732422	1.00708	0.823975	1.00708	0.854492	1.06811
												1.28174	0.976562	0.762939	1.43433	0.854492	0.88501	0.854492	0.88501	0.915527	0.976562
												0.518799	1.37329	1.2207	1.40381	1.2207	0.793457	0.701904	0.762939	0.793457	1.28174
												0.762939	0.518799	1.12915	1.12915	1.28174	1.00708	0.823975	0.640869	0.610352	0.671387
												0.671387	0.579834	1.0376	0.976562	0.823975	1.25122	0.640869	1.06811	0.854492	1.25122
												0.701904	1.06811	0.946045	0.579834	0.915527	0.946045	0.88501	0.88501	0.701904	0.946045
												1.00708	0.976562	0.793457	1.12915	0.671387	0.640869	0.762939	0.732422	0.793457	0.915527
												0.610352	0.518799	0.732422	0.976562	1.06811	0.671387	0.549316	0.701904	0.793457	1.19019
												0.946045	0.762939	1.00708	0.793457	1.2207	1.09863	0.976562	0.549316	0.762939	0.88501
												0.823975	0.732422	0.854492	1.00708	1.34277	1.09863	0.854492	1.0376	0.610352	1.00708
												0.88501	0.976562	1.09863	0.854492	0.823975	1.19019	1.06811	0.976562	1.06811	0.762939
												0.915527	1.15967	0.793457	0.88501	0.976562	1.15967	1.31226	0.976562	1.12915	0.854492
												0.762939	0.549316	0.976562	1.09863	0.976562	0.640869	0.854492	0.701904	0.671387	0.823975
												1.12915	0.671387	1.06811	0.823975	0.854492	1.31226	1.06811	0.732422	0.793457	1.06811
												0.732422	0.915527	0.854492	0.640869	1.19019	0.946045	0.976562	1.0376	0.793457	1.0376
												0.701904	0.579834	0.88501	1.2207	1.12915	0.946045	0.946045	0.823975	1.06811	0.640869
												1.2207	1.06811	0.701904	1.09863	0.793457	1.28174	0.671387	0.915527	1.06811	0.640869
												0.732422	0.762939	1.0376	1.19019	0.701904	0.762939	1.15967	0.732422	0.946045	0.762939
												1.19019	0.518799	0.762939	1.40381	1.06811	1.34277	1.00708	0.793457	1.00708	0.793457
												0.976562	0.610352	0.671387	1.0376	0.854492	0.915527	1.37329	0.793457	0.976562	0.946045
												1.28174	1.12915	0.762939	0.762939	0.946045	1.31226	1.0376	1.06811	0.762939	1.19019
												1.15967	1.37329	0.549316	1.40381	0.915527	1.0376	0.640869	1.09863	1.15967	0.915527
												1.46484	0.88501	0.854492	0.762939	1.12915	1.40381	0.793457	1.12915	0.701904	0.549316
												0.915527	0.732422	1.00708	1.25122	1.06811	1.06811	0.793457	1.06811	0.915527	0.579834
												1.09863	1.06811	0.732422	1.06811	1.19019	1.09863	1.43433	0.579834	1.00708	0.915527
												0.732422	0.610352	0.793457	1.2207	0.854492	0.793457	0.854492	0.671387	0.671387	1.00708
												1.25122	0.579834	1.12915	0.823975	0.793457	0.88501	0.823975	0.640869	0.976562	0.793457
												1.25122	0.946045	0.854492	0.732422	0.88501	0.854492	0.640869	0.518799	1.12915	0.701904
												0.732422	1.31226	0.915527	1.15967	0.793457	1.19019	0.88501	0.701904	0.579834	0.854492
												0.762939	0.671387	1.19019	0.946045	0.915527	1.15967	0.701904	0.549316	0.762939	1.09863
												0.640869	0.518799	0.823975	0.640869	0.976562	1.0376	0.671387	0.732422	0.823975	0.976562
												1.15967	1.06811	0.976562	0.854492	1.06811	1.00708	1.00708	0.762939	0.671387	1.12915
												0.854492	0.518799	0.732422	0.823975	1.67847	0.976562	0.88501	0.640869	1.31226	0.671387
												0.762939	0.701904	0.88501	0.823975	0.762939	0.823975	1.00708	0.549316	0.88501	1.06811
												1.28174	0.946045	1.00708	0.793457	0.946045	0.762939	1.15967	0.610352	0.610352	1.2207
												0.823975	0.762939	1.31226	1.31226	0.823975	0.976562	0.854492	0.854492	0.854492	0.88501
												1.12915	0.671387	0.946045	1.00708	0.88501	0.762939	0.610352	0.579834	0.610352	0.915527
												0.88501	0.701904	0.793457	1.2207	1.00708	0.946045	0.640869	0.610352	0.549316	0.854492
												0.854492	1.09863	0.854492	1.0376	1.61743	0.762939	1.19019	0.518799	0.701904	0.610352
												0.854492	0.976562	1.40381	1.28174	0.976562	1.12915	0.762939	0.549316	0.762939	0.915527
												0.854492	0.549316	0.549316	1.00708	0.732422	0.976562	0.701904	0.518799	0.946045	0.701904
												0.823975	0.701904	1.2207	1.28174	0.976562	1.19019	1.15967	0.762939	0.701904	0.88501
												0.640869	0.610352	0.793457	0.610352	1.09863	0.823975	1.37329	0.610352	1.06811	0.976562
												0.610352	1.25122	0.915527	1.52588	0.762939	1.15967	1.0376	0.610352	0.640869	0.701904
												0.549316	0.854492	0.732422	1.25122	0.915527	0.549316	1.2207	1.46484	0.518799	0.854492
												0.671387	0.915527	0.946045	1.46484	1.06811	1.09863	0.701904	0.976562	0.610352	0.976562
												0.610352	1.49536	0.610352	0.915527	0.976562	1.09863	1.00708	0.610352	1.00708	1.34277
												0.854492	0.915527	1.28174	0.793457	0.976562	0.915527	0.88501	0.854492	0.610352	1.2207
												0.915527	0.854492	0.823975	1.12915	0.946045	1.31226	0.823975	1.09863	0.762939	1.0376
												0.976562	0.88501	0.762939	1.00708	1.28174	0.823975	1.09863	0.579834	0.610352	1.0376
												0.976562	1.34277	0.88501	1.49536	1.52588	0.793457	0.976562	0.701904	0.823975	1.15967
												1.09863	1.2207	1.19019	1.25122	0.946045	1.06811	0.88501	0.610352	0.793457	0.793457
												1.2207	0.579834	0.640869	1.28174	1.12915	1.0376	1.06811	0.610352	0.793457	0.732422
												1.19019	0.610352	0.671387	1.15967	0.610352	1.2207	1.31226	0.518799	0.976562	0.793457
												1.2207	0.579834	0.915527	1.0376	0.915527	0.915527	1.09863	0.640869	1.0376	0.671387
												0.88501	0.610352	0.732422	0.762939	0.793457	1.19019	1.19019	0.579834	0.701904	0.854492
												0.88501	0.518799	0.610352	0.671387	0.976562	0.732422	1.06811	0.579834	0.732422	0.701904
												0.88501	0.732422	0.732422	1.37329	1.06811	0.701904	0.640869	0.518799	0.823975	0.762939
												1.15967	0.549316	0.671387	0.915527	1.19019	1.2207	1.43433	0.518799	0.915527	1.12915
												0.88501	0.640869	0.854492	0.701904	0.762939	0.976562	0.793457	0.549316	1.09863	0.976562
												1.19019	0.854492	1.00708	1.89209	0.762939	1.0376	1.0376	0.671387	0.640869	0.915527
												1.2207	0.793457	1.00708	1.15967	1.2207	1.19019	1.31226	0.823975	0.732422	1.06811
												1.34277	0.671387	0.793457	1.37329	0.976562	0.610352	0.579834	0.732422	0.946045	0.854492
												1.12915	0.640869	0.793457	1.00708	0.762939	0.732422	0.518799	0.549316	0.610352	1.15967
												1.43433	0.640869	0.579834	1.09863	1.58691	0.732422	0.671387	0.671387	0.640869	0.854492
												1.31226	0.671387	1.06811	1.2207	1.77002	0.823975	1.06811	0.671387	0.640869	1.15967
												1.25122	1.12915	0.762939	1.09863	1.37329	0.671387	1.25122	0.762939	0.549316	1.00708
												1.09863	1.06811	0.610352	1.25122	0.732422	0.976562	0.701904	0.762939	0.518799	0.946045
												0.976562	1.06811	0.88501	1.06811	1.28174	0.854492	1.12915	0.579834	0.549316	0.762939
												1.61743	0.732422	1.06811	1.25122	0.976562	0.762939	0.579834	0.579834	0.88501	0.701904
												1.5564	0.732422	0.671387	1.00708	0.640869	0.793457	0.640869	0.610352	0.762939	0.915527
												1.40381	1.40381	0.946045	1.25122	0.701904	0.518799	0.88501	0.946045	0.762939	1.19019
												0.915527	0.976562	1.0376	1.31226	0.823975	1.12915	0.854492	0.549316	0.671387	0.762939
												0.976562	0.854492	0.640869	1.34277	1.09863	1.46484	1.09863	0.549316	1.0376	0.823975
												1.09863	1.06811	0.823975	1.28174	1.0376	0.946045	0.88501	0.518799	0.823975	1.0376
												0.671387	0.549316	0.518799	1.34277	1.09863	1.40381	0.701904	0.610352	0.640869	1.19019
												0.579834	0.823975	0.701904	1.89209	0.915527	1.06811	1.19019	0.762939	0.549316	0.976562
												0.640869	1.12915	1.00708	1.34277	0.762939	1.28174	0.732422	0.793457	0.823975	1.2207
												1.06811	0.976562	0.579834	1.49536	0.793457	1.25122	0.915527	0.671387	0.732422	0.946045
												0.762939	0.640869	1.40381	1.58691	1.31226	1.15967	0.549316	0.640869	1.00708	0.671387
												1.00708	1.83106	1.15967	1.58691	0.762939	1.12915	0.915527	0.671387	0.976562	0.976562
												1.46484	0.640869	0.88501	1.09863	1.09863	1.09863	1.0376	0.640869	0.854492	0.579834
												1.34277	1.0376	0.762939	0.762939	1.00708	0.762939	0.915527	0.854492	0.915527	0.640869
												1.19019	1.28174	1.0376	0.579834	1.06811	0.88501	0.854492	0.579834	0.610352	0.915527
												0.976562	1.49536	0.823975	1.25122	1.43433	0.854492	0.579834	0.762939	0.671387	0.88501
												0.946045	0.793457	1.12915	1.00708	1.06811	1.0376	0.88501	0.762939	0.823975	0.671387
												0.762939	0.549316	1.00708	1.12915	1.31226	1.31226	0.701904	0.793457	0.854492	0.793457
												1.25122	0.671387	0.946045	0.671387	0.793457	0.88501	1.12915	0.823975	0.640869	0.671387
												1.0376	0.732422	0.793457	1.40381	0.732422	0.823975	0.701904	0.610352	0.762939	0.671387
												1.37329	0.549316	1.09863	0.579834	1.49536	0.88501	0.854492	0.793457	0.823975	0.88501
												0.946045	0.854492	1.37329	0.976562	0.915527	0.88501	0.976562	0.701904	0.671387	0.762939
												1.40381	0.732422	0.640869	1.12915	0.671387	1.37329	0.732422	1.0376	0.915527	0.915527
												1.25122	0.671387	0.88501	0.823975	1.06811	1.12915	1.12915	0.640869	0.701904	0.701904
												1.31226	1.64795	1.31226	0.976562	0.976562	0.854492	1.2207	0.762939	0.549316	0.915527
												0.854492	0.610352	0.88501	0.793457	0.793457	1.06811	1.40381	0.793457	0.610352	0.88501
												1.25122	0.976562	0.732422	0.549316	1.19019	0.976562	1.19019	0.762939	0.671387	1.12915
												1.12915	0.88501	1.09863	0.793457	1.0376	0.854492	1.06811	1.0376	0.793457	0.976562
												1.00708	0.579834	0.823975	1.00708	0.946045	1.15967	1.00708	0.579834	0.640869	0.946045
												1.06811	0.640869	0.793457	0.854492	0.762939	1.25122	0.976562	0.701904	0.732422	1.09863
												0.793457	0.518799	1.12915	0.88501	1.31226	0.915527	0.823975	0.732422	0.915527	0.823975
												0.732422	1.25122	0.610352	1.09863	0.946045	1.09863	1.09863	0.671387	0.579834	1.12915
												0.915527	0.762939	1.09863	0.823975	0.976562	1.34277	0.976562	0.610352	0.640869	0.640869
												0.915527	0.640869	0.610352	0.671387	0.915527	0.732422	0.671387	0.793457	1.06811	0.701904
												0.701904	0.915527	0.610352	1.2207	1.58691	1.0376	0.610352	0.610352	0.976562	0.946045
												0.88501	0.671387	0.579834	1.19019	0.854492	0.915527	1.15967	0.823975	0.671387	1.61743
												1.25122	1.2207	0.549316	1.40381	1.09863	1.06811	1.12915	0.579834	0.88501	0.640869
												1.19019	0.610352	0.579834	1.0376	0.88501	1.19019	1.09863	0.640869	0.671387	0.701904
												1.43433	0.701904	0.518799	0.762939	1.0376	1.15967	1.15967	0.762939	0.610352	1.0376
												1.19019	0.640869	0.946045	0.762939	1.40381	0.671387	1.00708	0.915527	0.701904	0.915527
												0.946045	0.976562	0.549316	1.06811	1.52588	0.946045	0.88501	1.12915	0.732422	0.671387
												0.946045	0.915527	0.823975	1.2207	1.06811	0.88501	1.28174	1.00708	0.88501	0.793457
												1.5564	0.823975	0.732422	0.823975	1.15967	0.793457	0.823975	0.762939	0.88501	1.00708
												0.976562	0.793457	0.640869	0.732422	1.0376	0.793457	1.12915	0.793457	0.823975	0.88501
												0.671387	0.732422	1.0376	1.15967	1.00708	0.854492	1.0376	0.854492	1.09863	1.31226
												1.31226	0.549316	1.06811	0.976562	1.25122	1.15967	1.00708	0.610352	0.762939	1.09863
												0.915527	0.671387	1.00708	0.640869	1.19019	1.15967	0.823975	0.701904	0.762939	0.976562
												0.701904	0.946045	0.610352	0.854492	1.0376	0.640869	0.88501	0.701904	0.823975	1.12915
												0.762939	0.915527	0.88501	0.823975	1.19019	1.06811	1.00708	0.549316	0.762939	1.06811
												1.5564	0.610352	0.976562	0.823975	1.15967	0.88501	1.06811	1.15967	0.701904	0.762939
												0.854492	0.793457	0.915527	0.793457	0.793457	1.06811	0.793457	0.518799	0.793457	1.49536
												1.0376	0.701904	1.00708	1.37329	1.43433	1.43433	0.610352	0.701904	0.976562	0.823975
												1.09863	0.701904	0.823975	1.31226	1.00708	0.701904	0.88501	0.88501	0.946045	0.88501
												1.12915	0.701904	0.701904	1.00708	1.86157	1.25122	0.671387	0.762939	0.671387	1.0376
												1.2207	0.762939	0.610352	1.2207	1.61743	0.976562	0.88501	0.793457	0.610352	0.854492
												1.58691	1.0376	0.762939	1.0376	0.88501	0.762939	0.793457	0.915527	0.701904	1.34277
												0.732422	0.671387	1.00708	1.28174	0.793457	1.00708	1.15967	1.00708	0.640869	0.518799
												1.15967	1.09863	1.25122	1.00708	0.915527	1.0376	1.19019	0.946045	0.88501	0.701904
												0.793457	1.19019	0.854492	1.28174	0.88501	0.976562	0.823975	0.610352	0.88501	0.976562
												1.67847	0.823975	0.915527	1.52588	1.09863	0.640869	1.12915	0.946045	1.09863	0.915527
												0.976562	0.610352	0.671387	1.25122	1.46484	0.518799	0.915527	0.671387	0.671387	1.09863
												1.15967	0.732422	0.518799	1.46484	1.25122	1.09863	0.762939	0.610352	0.640869	1.28174
												0.610352	1.09863	0.549316	0.88501	1.34277	1.00708	1.37329	0.823975	0.640869	0.88501
												1.06811	0.610352	0.854492	0.610352	1.2207	0.762939	1.12915	0.915527	0.88501	0.823975
												0.823975	1.37329	1.25122	0.946045	1.09863	1.12915	0.793457	0.88501	1.0376	0.701904
												0.701904	0.610352	1.19019	0.793457	1.09863	0.579834	0.732422	0.732422	0.671387	0.976562
												1.5564	0.732422	0.671387	1.12915	1.52588	1.0376	1.09863	0.640869	0.701904	0.793457
												0.793457	0.610352	0.823975	1.00708	1.0376	1.2207	0.854492	0.823975	0.976562	0.915527
												1.0376	0.610352	0.579834	1.28174	1.28174	1.31226	1.00708	0.976562	0.88501	1.06811
												1.09863	0.640869	0.640869	1.15967	0.640869	0.579834	0.823975	0.976562	0.640869	0.854492
												1.19019	0.701904	0.579834	1.0376	1.31226	0.762939	1.00708	0.610352	0.518799	1.2207
												1.19019	0.671387	0.793457	0.762939	1.06811	1.06811	0.976562	0.976562	0.88501	1.12915
												1.25122	0.854492	1.25122	0.671387	1.25122	1.00708	1.09863	0.640869	0.701904	1.00708
												1.25122	0.549316	0.946045	0.671387	1.43433	0.854492	0.701904	0.915527	0.701904	0.701904
												0.701904	0.823975	0.946045	1.37329	0.793457	0.701904	0.671387	0.701904	0.640869	1.0376
												1.2207	0.823975	0.732422	0.915527	1.06811	1.12915	1.00708	0.518799	0.762939	0.823975
												0.701904	0.946045	0.579834	1.15967	0.88501	0.88501	1.31226	0.976562	0.915527	1.19019
												1.12915	0.976562	0.946045	1.37329	1.43433	0.88501	1.00708	0.732422	0.671387	0.671387
												1.31226	0.610352	0.793457	1.00708	1.2207	1.28174	0.946045	0.732422	0.610352	1.06811
												1.28174	0.671387	1.2207	0.732422	0.793457	1.2207	1.09863	0.701904	0.640869	0.915527
												0.88501	0.732422	0.762939	1.09863	0.732422	0.976562	0.88501	0.671387	0.610352	0.946045
												0.793457	0.793457	0.915527	1.2207	0.732422	0.732422	0.823975	1.00708	0.823975	0.915527
												1.06811	0.579834	0.610352	1.09863	1.37329	1.0376	1.0376	0.88501	0.671387	1.15967
												1.15967	0.854492	0.976562	0.549316	0.732422	0.854492	0.701904	0.579834	0.88501	0.854492
												1.2207	0.732422	1.2207	1.25122	0.915527	0.701904	0.671387	0.976562	0.610352	0.762939
												1.12915	0.793457	0.976562	0.915527	0.671387	0.640869	0.823975	0.518799	0.518799	0.549316
												1.25122	0.671387	1.31226	0.701904	1.06811	0.671387	0.579834	1.06811	0.732422	1.37329
												0.762939	0.701904	0.88501	0.88501	0.854492	0.732422	0.518799	0.793457	0.976562	0.946045
												0.701904	1.00708	0.854492	0.762939	1.06811	0.915527	0.732422	0.793457	0.579834	1.19019
												0.976562	0.854492	0.640869	0.88501	0.793457	0.915527	1.0376	1.09863	0.976562	1.0376
												1.52588	0.579834	1.12915	1.0376	0.823975	1.15967	0.854492	0.823975	0.793457	0.854492
												0.610352	0.762939	0.946045	0.793457	0.976562	0.88501	0.579834	1.12915	0.640869	1.25122
												0.701904	0.946045	1.00708	0.793457	0.793457	1.00708	0.610352	1.28174	0.915527	0.915527
												0.88501	0.701904	0.854492	0.946045	0.946045	0.732422	0.732422	0.915527	0.793457	0.946045
												1.31226	0.518799	0.610352	0.915527	1.15967	0.823975	0.610352	0.854492	0.88501	1.2207
												0.762939	0.823975	0.610352	0.732422	0.793457	0.823975	0.732422	0.976562	0.701904	1.06811
												1.09863	0.640869	1.25122	0.701904	0.88501	0.671387	0.671387	0.823975	0.579834	0.854492
												0.732422	1.12915	0.701904	0.976562	1.06811	0.793457	0.762939	0.610352	0.640869	0.701904
												0.671387	0.579834	0.701904	0.640869	1.70898	0.732422	0.732422	0.915527	0.793457	0.793457
												0.640869	0.823975	0.762939	0.976562	0.793457	0.671387	0.762939	0.823975	0.671387	1.06811
												0.915527	0.640869	0.946045	1.12915	0.976562	0.976562	1.0376	0.732422	0.762939	1.25122
												0.854492	0.854492	1.15967	0.732422	1.34277	1.31226	0.610352	0.946045	0.549316	0.88501
												1.09863	0.671387	0.823975	1.06811	1.12915	0.854492	1.00708	0.793457	0.549316	0.793457
												1.46484	0.671387	0.549316	1.2207	1.25122	1.52588	0.915527	1.31226	0.823975	0.732422
												0.976562	0.610352	0.579834	0.762939	0.88501	1.2207	0.762939	0.946045	1.00708	0.671387
												1.34277	0.640869	0.823975	0.915527	0.823975	1.00708	0.732422	0.671387	0.610352	1.34277
												0.732422	0.640869	0.762939	0.732422	1.15967	0.793457	1.09863	1.31226	0.701904	1.37329
												0.854492	0.579834	0.793457	1.28174	1.0376	0.610352	0.732422	0.671387	0.579834	1.06811
												0.610352	0.549316	0.793457	1.58691	1.0376	0.579834	0.823975	0.88501	0.610352	0.854492
												0.640869	0.549316	0.671387	1.34277	0.88501	0.640869	0.640869	0.854492	0.610352	1.15967
												1.64795	0.701904	0.762939	0.946045	0.88501	1.0376	0.732422	1.19019	0.701904	0.671387
												1.2207	0.946045	0.854492	1.52588	0.946045	0.88501	0.976562	1.0376	0.793457	0.671387
												1.52588	0.701904	0.671387	0.549316	0.88501	1.19019	1.00708	0.823975	0.854492	0.976562
												0.88501	0.732422	0.854492	1.28174	1.2207	0.88501	1.2207	1.25122	0.823975	0.640869
												0.549316	0.732422	0.640869	1.12915	0.976562	0.732422	0.518799	0.549316	1.00708	0.915527
												1.00708	0.640869	0.701904	0.915527	1.15967	0.976562	0.579834	0.610352	0.793457	0.732422
												0.671387	0.88501	1.34277	0.976562	0.762939	0.976562	0.854492	1.34277	0.610352	1.0376
												1.5564	1.00708	0.793457	1.09863	1.12915	0.88501	1.0376	0.793457	0.915527	0.88501
												0.976562	0.701904	0.915527	0.732422	1.19019	1.00708	0.579834	0.88501	1.00708	0.610352
												0.762939	1.34277	0.976562	1.06811	1.19019	0.88501	0.549316	0.671387	0.610352	0.671387
												0.823975	1.40381	1.15967	1.37329	0.915527	0.762939	0.732422	0.671387	0.762939	0.640869
												0.946045	0.579834	0.671387	1.06811	1.25122	1.09863	0.701904	0.823975	0.579834	0.610352
												0.88501	0.640869	0.88501	1.28174	1.00708	0.671387	1.00708	0.518799	0.671387	0.976562
												1.06811	0.610352	1.0376	0.976562	1.25122	0.793457	0.854492	0.823975	0.732422	0.701904
												1.0376	0.579834	0.88501	0.701904	0.701904	0.793457	1.00708	1.0376	0.732422	0.946045
												1.52588	0.762939	0.671387	0.976562	1.61743	0.976562	0.701904	1.12915	0.671387	0.823975
												0.701904	0.610352	1.12915	0.854492	0.854492	0.701904	0.671387	0.518799	0.88501	1.06811
												1.0376	1.0376	0.671387	1.28174	1.52588	0.976562	1.09863	0.640869	0.915527	0.610352
												1.06811	0.976562	1.00708	0.671387	0.732422	0.823975	0.946045	0.640869	0.946045	1.06811
												0.946045	0.976562	0.610352	0.88501	0.671387	0.640869	0.793457	0.762939	0.854492	1.09863
												1.06811	0.762939	0.793457	0.823975	1.06811	0.915527	0.701904	0.671387	0.640869	0.854492
												1.12915	0.579834	0.671387	0.793457	1.15967	0.610352	0.762939	0.549316	0.579834	0.854492
												1.00708	1.58691	1.0376	1.15967	0.793457	1.12915	0.946045	0.671387	0.915527	0.579834
												1.06811	0.762939	0.579834	1.00708	1.5564	0.793457	0.793457	0.579834	1.09863	0.946045
												0.823975	0.915527	1.09863	0.823975	1.09863	0.579834	0.793457	0.579834	1.12915	1.09863
												1.09863	1.28174	0.823975	0.640869	1.09863	0.762939	0.976562	0.976562	0.701904	1.00708
												1.31226	1.15967	0.854492	0.610352	1.52588	0.915527	0.915527	0.579834	0.762939	0.732422
												0.671387	0.579834	0.88501	0.854492	0.793457	0.854492	1.28174	0.549316	0.762939	0.823975
												0.671387	1.40381	0.640869	1.2207	1.25122	0.701904	1.2207	0.518799	0.732422	0.946045
												0.854492	1.15967	1.37329	0.610352	0.671387	1.06811	0.793457	0.549316	0.823975	1.0376
												1.12915	0.518799	0.762939	0.88501	1.19019	0.854492	0.701904	0.549316	0.762939	0.88501
												1.19019	0.762939	1.34277	1.0376	1.19019	0.762939	0.976562	0.823975	1.00708	0.946045
												1.49536	0.854492	0.610352	0.701904	1.09863	1.12915	0.610352	0.88501	0.732422	0.976562
												1.15967	0.671387	0.549316	1.25122	1.0376	0.823975	0.88501	0.610352	0.671387	0.793457
												1.19019	0.762939	1.15967	0.823975	1.40381	0.793457	0.732422	0.854492	0.946045	0.823975
												1.25122	0.671387	0.946045	0.671387	1.09863	0.915527	0.732422	0.610352	0.701904	1.12915
												0.88501	0.915527	1.28174	0.823975	0.976562	1.0376	0.701904	0.579834	0.915527	0.976562
												1.0376	0.518799	0.640869	0.762939	1.00708	1.2207	0.793457	0.793457	0.823975	0.88501
												0.732422	0.793457	0.762939	0.854492	0.671387	1.09863	0.701904	0.701904	0.762939	0.701904
												1.5564	1.49536	0.701904	0.762939	1.12915	1.2207	0.640869	1.0376	0.793457	0.549316
												0.88501	0.671387	0.946045	0.823975	1.92261	1.15967	0.579834	0.579834	0.701904	0.854492
												1.00708	0.946045	1.15967	1.15967	0.976562	1.12915	1.0376	0.701904	1.0376	0.976562
												1.43433	1.37329	0.854492	0.915527	1.09863	0.793457	0.823975	0.762939	0.88501	0.762939
												1.31226	0.976562	1.49536	1.12915	0.946045	0.88501	0.549316	0.549316	1.0376	0.762939
												0.88501	0.640869	0.976562	0.793457	0.946045	1.25122	1.00708	0.671387	0.549316	0.732422
												0.854492	0.671387	1.19019	1.49536	1.43433	1.0376	0.732422	0.579834	1.0376	0.610352
												1.12915	1.00708	0.854492	1.00708	0.915527	0.88501	0.579834	0.671387	0.701904	1.15967
												0.701904	0.732422	0.732422	0.640869	1.31226	1.2207	0.946045	0.579834	0.671387	0.793457
												1.0376	0.701904	0.701904	0.610352	0.610352	1.15967	0.854492	0.671387	0.579834	0.946045
												0.88501	0.549316	0.610352	1.31226	0.793457	1.00708	0.701904	0.854492	0.823975	1.34277
												0.671387	0.793457	0.976562	0.88501	1.2207	0.946045	0.823975	0.640869	1.06811	1.00708
												0.732422	0.732422	0.549316	1.2207	1.12915	1.0376	0.793457	0.640869	1.09863	0.915527
												1.0376	0.610352	1.52588	1.0376	0.88501	0.640869	0.946045	0.518799	1.00708	0.823975
												1.40381	0.854492	0.762939	1.19019	1.15967	1.2207	1.0376	0.732422	0.854492	0.946045
												0.976562	0.518799	0.640869	0.823975	1.06811	0.610352	0.640869	0.549316	0.732422	0.976562
												1.15967	0.640869	1.0376	0.579834	1.09863	0.976562	0.549316	0.579834	0.88501	0.915527
												1.00708	0.915527	0.640869	0.640869	1.0376	0.946045	0.854492	0.640869	0.732422	1.12915
												1.00708	0.701904	0.823975	1.09863	0.640869	0.915527	0.946045	0.946045	1.19019	0.823975
												1.09863	1.31226	0.518799	1.15967	0.701904	0.701904	1.09863	0.671387	1.15967	0.640869
												0.915527	0.640869	0.579834	0.671387	0.976562	1.2207	0.610352	0.610352	0.671387	0.915527
												1.06811	1.09863	0.671387	0.579834	1.06811	1.19019	0.640869	0.579834	0.579834	0.915527
												1.25122	0.732422	0.610352	0.579834	1.58691	1.15967	0.640869	0.610352	0.640869	0.976562
												0.946045	1.40381	0.88501	0.793457	1.37329	0.854492	0.823975	0.854492	0.732422	0.732422
												0.701904	0.732422	0.88501	1.09863	1.09863	0.762939	0.549316	0.823975	0.579834	1.0376
												0.701904	0.518799	0.579834	0.946045	1.46484	1.0376	0.762939	0.610352	0.549316	0.732422
												0.610352	1.2207	0.579834	0.88501	1.31226	0.946045	1.25122	0.823975	1.2207	0.976562
												1.43433	0.579834	0.946045	1.0376	1.80054	0.793457	0.579834	0.946045	0.946045	0.946045
												1.06811	0.88501	0.823975	1.7395	1.5564	0.671387	0.579834	0.823975	1.2207	1.00708
												0.854492	0.732422	0.946045	0.610352	1.28174	1.00708	0.88501	0.579834	0.915527	0.732422
												0.976562	0.671387	0.640869	0.640869	1.09863	0.946045	0.579834	0.976562	0.671387	1.06811
												0.946045	0.610352	1.0376	0.671387	1.25122	0.732422	0.610352	0.579834	0.732422	0.671387
												1.00708	0.793457	1.09863	0.579834	0.946045	1.15967	0.946045	0.640869	1.15967	0.946045
												1.06811	0.610352	1.09863	1.15967	0.976562	0.732422	0.823975	0.549316	0.854492	1.28174
												0.976562	0.579834	0.579834	0.946045	1.2207	0.701904	0.549316	0.762939	1.09863	1.00708
												1.28174	0.549316	0.671387	1.19019	1.46484	0.946045	0.671387	0.518799	0.610352	0.793457
												1.0376	0.701904	0.640869	0.88501	1.2207	0.610352	0.640869	0.671387	0.579834	1.00708
												1.46484	0.701904	0.732422	1.06811	1.31226	1.00708	0.610352	0.549316	1.19019	1.0376
												1.09863	0.610352	0.579834	0.915527	1.25122	0.793457	0.854492	0.701904	0.793457	0.762939
												0.915527	1.34277	0.88501	0.671387	1.86157	0.88501	1.09863	0.854492	0.671387	0.640869
												0.915527	0.732422	0.701904	1.09863	0.946045	0.823975		0.549316	0.793457	1.15967
												1.25122	0.701904	1.00708	0.762939	1.09863	0.610352		1.19019	0.732422	0.671387
												0.976562	0.793457	0.701904	0.701904	1.15967	0.579834		1.19019	0.88501	1.06811
												0.88501	1.0376	0.793457	1.52588	1.46484	0.640869		0.88501	0.732422	1.0376
												1.06811	0.579834	0.88501	1.61743	0.732422	0.88501		1.0376	0.579834	0.88501
												1.43433	0.518799	0.579834	1.06811	0.823975	1.15967		1.06811	0.854492	1.0376
												1.0376	1.46484	0.610352	0.579834	0.915527	0.88501		0.823975	0.732422	0.640869
												1.12915	0.579834	1.28174	0.610352	1.2207	1.00708		0.915527	0.579834	0.579834
												0.823975	0.793457	0.610352	0.671387	1.15967	0.610352		1.00708	0.640869	0.854492
												0.823975	0.579834	0.762939	0.640869	1.34277	0.854492		1.09863	0.915527	0.793457
												1.46484	1.15967	0.701904	0.88501	0.88501	0.640869		1.0376	0.823975	1.0376
												0.823975	0.549316	0.640869	0.610352	1.00708	0.610352		0.640869	0.762939	1.34277
												1.19019	1.09863	0.823975	0.854492	0.915527	0.946045		0.976562	0.88501	1.06811
												0.732422	0.762939	0.732422	0.549316	0.88501	0.946045		1.12915	1.0376	1.09863
												1.28174	0.732422	0.823975	0.762939	1.43433	0.976562		0.762939	0.640869	0.88501
												0.976562	1.00708	0.732422	0.793457	0.640869	0.88501		0.579834	0.976562	0.549316
												1.00708	1.15967	0.671387	0.823975	0.854492	1.2207		1.5564	0.579834	1.25122
												1.2207	0.579834	0.915527	1.31226	0.610352	0.976562		0.640869	0.793457	1.06811
												1.34277	0.671387	0.732422	0.915527	0.946045	1.06811		0.640869	0.701904	0.732422
												1.43433	0.610352	0.732422	0.976562	1.28174	0.976562		0.518799	1.12915	0.732422
												0.854492	1.06811	0.518799	1.0376	1.31226	0.793457		0.579834	0.915527	0.640869
												1.40381	0.640869	0.976562	0.732422	1.25122	0.640869		0.518799	0.518799	0.946045
												0.915527	1.00708	0.823975	0.579834	1.00708	1.0376		0.610352	0.671387	1.12915
												0.762939	1.09863	0.976562	1.12915	1.15967	0.854492		0.579834	0.671387	0.854492
												1.15967	0.732422	0.915527	0.701904	1.7395	1.31226		0.640869	0.854492	1.06811
												0.976562	0.793457	1.0376	0.762939	1.31226	0.701904		0.671387	1.00708	0.88501
												1.0376	0.854492	0.823975	1.31226	1.19019	0.762939		0.579834	0.762939	1.31226
												0.701904	1.00708	0.671387	1.09863	1.09863	0.671387		0.793457	0.976562	1.15967
												0.976562	0.946045	1.15967	1.2207	1.31226	0.823975		0.640869	0.915527	1.0376
												0.823975	0.915527	0.946045	0.854492	1.64795	0.854492		0.518799	0.579834	1.06811
												1.37329	1.06811	0.640869	0.701904	1.25122	0.793457		0.610352	0.671387	0.976562
												1.49536	1.0376	1.0376	0.579834	1.46484	0.579834		0.518799	0.823975	0.88501
												0.793457	1.28174	1.12915	1.40381	1.37329	0.701904		0.579834	0.610352	0.976562
												1.49536	1.09863	1.00708	0.946045	0.976562	1.34277		0.701904	0.823975	0.88501
												1.31226	1.25122	0.793457	2.04468	1.19019	0.701904		0.549316	0.915527	0.976562
												0.854492	0.701904	0.671387	1.09863	0.793457	1.28174		0.518799	0.854492	0.732422
												1.09863	1.12915	0.915527	1.25122	1.09863	1.5564		0.671387	1.00708	0.976562
												1.58691	0.976562	1.34277	1.25122	1.06811	1.19019		0.579834	0.579834	0.976562
												0.976562	1.0376	0.762939	0.762939	1.52588	0.976562		0.640869	0.640869	0.732422
												1.52588	0.793457	1.52588	0.762939	0.579834	0.671387		0.732422	0.610352	0.701904
												1.40381	0.640869	0.701904	0.88501	0.762939	0.976562		0.549316	0.732422	0.671387
												1.0376	1.0376	1.52588	0.701904	1.09863	0.854492		0.854492	0.732422	0.610352
												0.915527	1.28174	0.701904	0.854492	0.793457	0.823975		0.976562	1.00708	0.762939
												1.2207	0.88501	0.549316	0.579834	1.09863	0.640869		0.579834	0.640869	0.793457
												0.854492	1.2207	0.610352	0.579834	0.793457	0.915527		0.579834	0.793457	1.00708
												0.976562	1.2207	0.732422	0.823975	1.00708	1.09863		0.549316	0.701904	0.915527
												0.88501	0.701904	1.00708	0.823975	1.12915	1.15967		0.610352	0.854492	0.762939
												1.15967	0.946045	1.31226	0.915527	0.732422	0.946045		0.640869	0.701904	0.915527
												1.19019	0.762939	1.12915	0.762939	1.5564	1.28174		0.671387	1.31226	0.854492
												0.793457	1.46484	1.12915	0.946045	0.640869	1.06811		0.640869	0.640869	1.06811
												0.915527	0.762939	1.25122	1.40381	0.579834	0.976562		0.610352	1.00708	0.793457
												1.09863	1.28174	1.46484	0.793457	0.88501	0.854492		0.793457	0.854492	1.2207
												1.06811	1.19019	1.06811	0.823975	1.43433	1.31226		0.854492	0.793457	0.701904
												0.671387	0.518799	0.793457	0.732422	1.67847	0.88501		1.00708	0.518799	1.25122
												1.06811	0.915527	1.15967	0.823975	1.12915	1.5564		0.732422	0.823975	0.701904
												0.762939	1.46484	1.12915	0.671387	1.0376	0.701904		0.701904	1.2207	0.762939
												1.0376	1.37329	1.0376	0.946045	0.732422	1.0376		0.701904	1.00708	1.09863
												1.19019	1.37329	1.12915	0.946045	1.12915	0.823975		0.671387	0.946045	0.793457
												1.49536	1.25122	0.640869	0.640869	0.946045	0.915527		0.793457	0.671387	1.12915
												1.34277	0.640869	1.15967	0.732422	0.854492	1.0376		0.610352	0.88501	1.09863
												0.823975	0.976562	1.34277	0.946045	0.762939	0.976562		0.762939	0.793457	0.793457
												0.701904	0.793457	1.0376	0.88501	1.58691	1.28174		0.732422	0.976562	1.0376
												0.854492	0.762939	1.2207	0.640869	0.976562	1.06811		0.854492	0.915527	0.579834
												1.37329	0.732422	1.06811	0.671387	0.946045	0.701904		0.732422	0.793457	0.88501
												1.0376	0.762939	0.88501	0.762939	0.915527	0.671387		0.762939	0.549316	0.701904
												1.28174	1.5564	0.732422	0.976562	0.762939	1.06811		0.88501	0.762939	0.976562
												1.58691	0.518799	1.7395	0.671387	1.19019	1.25122		0.88501	0.732422	0.88501
												0.88501	0.793457	0.976562	1.12915	1.7395	0.976562		0.640869	0.732422	1.00708
												0.671387	1.19019	0.793457	0.946045	1.2207	0.854492		0.671387	1.0376	1.00708
												1.00708	0.732422	1.49536	0.701904	0.762939	0.701904		0.732422	1.0376	1.09863
												0.915527	1.43433	1.67847	0.549316	0.915527	1.2207		0.640869	0.762939	0.701904
												1.52588	0.701904	0.823975	0.762939	0.915527	1.37329		0.701904	1.00708	0.946045
												1.15967	0.701904	0.732422	1.06811	0.854492	1.15967		0.518799	0.640869	0.88501
												1.06811	0.88501	1.58691	0.732422	1.2207	0.610352		0.640869	0.854492	1.0376
												1.09863	0.640869	1.00708	0.793457	1.06811	0.854492		0.915527	0.762939	0.793457
												0.701904	0.610352	1.19019	1.09863	1.00708	0.671387		0.732422	0.701904	0.671387
												1.43433	0.854492	1.00708	0.640869	1.06811	1.0376		0.610352	0.640869	0.976562
												1.09863	0.823975	0.732422	1.15967	0.946045	0.549316		0.640869	0.854492	0.854492
												1.25122	0.823975	1.46484		1.25122	1.09863		0.671387	1.00708
												1.15967	0.976562	1.58691		0.732422	1.2207		0.823975	0.915527
												0.823975	1.09863	0.579834		0.946045	1.06811		0.946045	0.976562
												1.31226	0.88501	1.61743		1.0376	0.762939		0.88501	0.732422
												0.793457	1.70898	1.34277		1.67847	1.09863		0.732422	0.732422
												0.823975	0.88501	1.09863		0.762939	1.15967		0.701904	0.610352
												0.793457	0.823975	0.732422		1.06811	1.2207		0.671387	1.0376
												1.19019	0.793457	0.579834		0.640869	0.762939		0.88501	1.00708
												0.823975	1.0376	1.15967		0.823975	0.671387		0.640869	0.946045
												0.854492	0.762939	0.579834		1.61743	0.946045		1.09863	0.854492
												0.854492	1.0376	1.0376		0.823975	1.25122		0.88501	0.762939
												1.40381	1.06811	0.946045		1.34277	1.34277		0.762939	1.12915
												1.06811	0.762939	0.823975		1.77002	0.732422		0.610352	1.06811
												0.854492	1.34277	1.09863		1.52588	0.762939		0.671387	1.06811
												0.793457	0.976562	0.762939		1.52588	1.12915		0.640869	1.00708
												1.25122	0.793457	0.915527		0.854492	0.793457		0.793457	0.732422
												0.762939	0.915527	0.88501		1.12915	1.2207		0.701904	0.976562
												1.2207	0.793457	0.823975		1.0376	1.2207		0.671387	0.732422
												0.88501	0.671387	0.701904			1.25122		0.762939	0.793457
												0.793457	0.88501	0.610352			0.671387		0.701904	0.762939
												0.701904	1.31226	0.915527			1.00708		0.946045	0.640869
												1.06811	1.0376	0.946045			0.946045		0.701904	0.915527
												1.15967	1.00708	0.946045			1.00708		1.0376	0.610352
												1.58691	1.37329	0.946045			1.12915		0.823975	1.06811
												0.915527	1.19019	0.854492			1.00708		0.976562	0.915527
												0.915527	0.793457	0.88501			1.09863		0.671387	1.06811
												0.823975	0.701904	0.854492			1.19019		0.732422	1.0376
												0.701904	1.06811	0.701904			0.976562		0.762939	0.640869
												0.701904	0.854492	1.12915			0.88501		0.823975	0.946045
												0.915527	0.762939	1.43433			1.25122		1.12915	1.0376
												1.43433	1.31226	1.40381			1.09863		0.610352	1.40381
												1.2207	1.09863	1.5564			0.579834		0.579834	1.25122
												0.854492	1.0376	1.2207			1.09863		0.640869	0.610352
												1.25122	0.640869	0.762939			0.701904		1.06811	0.823975
												0.88501	1.12915	0.640869			1.25122		1.2207	0.549316
												0.610352	1.19019	0.732422			0.88501		0.793457	0.946045
												1.25122	1.00708	0.976562			1.49536		0.823975	0.854492
												0.915527	1.06811	0.732422			1.09863		0.793457	0.946045
												1.12915	1.00708	0.640869			0.732422		1.19019	0.640869
												0.88501	1.06811	1.34277			0.671387		0.701904	0.762939
												0.823975	0.854492	0.915527			0.610352		0.976562	1.0376
												0.976562	1.5564	0.701904			0.610352		0.640869	0.762939
												0.823975	1.34277	0.549316			0.762939		0.823975	0.88501
												1.06811	0.701904	1.12915			1.12915		0.732422	0.915527
												1.15967	1.19019	1.49536			0.762939		1.0376	0.640869
												1.0376	1.19019	0.915527			0.549316		1.12915	1.06811
												1.19019	1.31226	0.823975			0.823975		0.88501	0.762939
												0.823975	0.946045	0.854492			0.762939		1.09863	0.854492
												1.06811	1.06811	0.732422			0.640869		0.762939	0.640869
												0.793457	0.549316	0.946045			0.549316		0.88501	1.0376
												0.762939	1.06811				0.854492		1.06811	0.854492
												1.61743	0.671387				0.793457		0.671387	0.915527
												0.915527	1.0376				0.701904		0.946045	0.732422
												0.88501	0.762939				1.06811		0.701904	0.732422
												1.0376	0.549316				1.12915		1.15967	0.732422
												0.701904	0.793457				1.2207		0.823975	0.762939
												1.2207	1.09863				1.00708		0.854492	0.701904
												0.915527	0.976562				0.671387		0.640869	0.793457
												0.854492	0.610352				0.915527		0.762939	0.793457
												1.34277	1.09863				0.701904		0.88501	0.701904
												1.0376	1.19019				0.793457		0.579834	0.701904
												0.762939	0.640869				0.671387		0.701904	0.640869
												1.19019	0.671387				1.25122		0.671387	0.610352
												0.610352	0.701904				1.00708		1.09863	0.976562
												0.762939	0.671387				0.823975		0.823975	0.946045
												0.762939	0.518799				0.88501		0.640869
												0.946045	0.701904				0.579834		1.00708
												0.732422	0.854492				0.640869		0.701904
												1.12915	0.976562				1.06811		0.88501
												0.88501	1.06811				0.976562		1.06811
												1.28174	1.19019				1.0376		1.15967
												1.06811	0.732422				0.762939		0.701904
												0.915527	0.701904				0.549316		0.671387
												0.946045	0.671387				0.793457		0.610352
												0.732422	0.793457				1.0376		0.701904
												0.549316	0.762939				0.915527		0.732422
												0.640869	0.793457				0.793457		0.793457
												0.976562	0.762939				0.762939		0.915527
												0.88501	0.701904				1.0376		0.854492
												0.946045	0.549316				1.28174		0.793457
												1.0376	0.671387				0.946045		0.732422
												0.732422	0.518799				0.793457		0.915527
												0.946045	0.732422				1.0376		0.640869
												1.2207	0.915527				0.88501		1.15967
												0.854492	1.00708				1.09863		0.671387
												0.946045	0.732422				0.701904		1.09863
												1.34277	0.701904				0.671387		0.854492
												0.88501	1.15967				0.823975		0.854492
													0.88501				0.732422		0.762939
													1.06811				1.06811		0.549316
													0.701904				0.823975		0.732422
													0.854492				0.976562		0.946045
													0.88501				0.640869		0.549316
													1.00708				0.793457		0.701904
													0.976562				1.0376		1.00708
													1.15967				0.640869		0.732422
													0.88501				0.762939		0.946045
													0.976562				1.00708		0.579834
													1.12915				0.946045		0.915527
													0.793457				1.06811		0.549316
													0.732422				1.31226		0.640869
													1.15967				0.732422		0.854492
													0.732422				0.946045		0.579834
													0.88501				1.25122		0.793457
													0.610352				1.06811		0.640869
													1.06811				1.00708		0.976562
													0.640869				0.793457		0.793457
													1.06811				0.732422		0.701904
													0.640869				0.793457		0.732422
													0.671387				0.823975		0.610352
													1.06811				1.0376		0.518799
													0.732422				0.915527		0.640869
													0.976562				0.854492		0.640869
													0.732422				0.823975		0.915527
													0.701904				0.854492		1.00708
													0.610352				0.823975		0.549316
													1.0376				1.00708		0.610352
													1.2207				0.854492		0.701904
													1.40381				1.2207		0.579834
													1.09863				0.976562		0.701904
													1.12915				0.579834		0.854492
													1.37329				0.823975		0.671387
													0.671387				0.640869		0.640869
													0.976562				1.06811		0.671387
													0.915527				0.732422		1.12915
													1.00708				1.25122		0.88501
													0.518799				0.823975		0.701904
													1.06811				0.762939		0.610352
													0.823975				1.0376		0.88501
													0.854492				0.640869		0.640869
													1.28174				0.88501		0.762939
													0.640869				0.732422		1.15967
													1.0376				1.09863		0.518799
													0.732422				0.549316		0.579834
													0.915527				0.640869
													0.640869				0.732422
													1.31226				0.793457
													0.976562				1.00708
													1.12915
													0.823975
													0.854492
													1.25122
													0.823975
													0.640869
													0.915527
													0.946045
													0.732422
													1.19019
													1.2207
													1.15967
													0.854492
													0.88501
													0.976562
													1.64795
													0.701904
													0.671387
													0.915527
													1.25122
													0.915527
													1.0376
													1.25122
													0.88501
													1.25122
													1.00708
													0.976562
													0.762939
													0.640869
													1.0376
													1.40381
													1.25122
													0.793457
													1.0376
													1.15967
													0.610352
													0.88501
													1.15967
													0.976562
													0.732422
													1.12915
													0.579834
													0.915527
													0.518799
													0.640869
													0.762939
													0.793457
													1.0376
													1.19019
													0.823975
													0.579834
													0.762939
													1.0376
													1.06811
													0.976562
													1.06811
													0.976562
													0.915527
													0.915527
													1.06811
													0.946045
													1.00708
													0.579834
													1.09863
													1.15967
													0.915527
													1.25122
													1.43433
													1.06811
													0.732422
													1.52588
													0.732422
													0.976562
													0.823975
													1.0376
													0.976562
													1.25122
													1.12915
													0.976562
													0.976562
													1.12915
													1.25122
													1.06811
													1.19019
													0.640869
													1.28174
													0.732422
													0.610352
													0.579834
													0.640869
													1.00708
													0.88501
													1.06811
													0.946045
													0.976562
													1.12915
													0.732422
													0.762939
													1.15967
													1.28174
													0.946045
													0.946045
													0.915527
													1.28174
													1.15967
													1.28174
													0.732422
													0.88501
													1.06811
													0.946045
													1.34277
													1.25122
													1.37329
													0.640869
													1.19019
													1.28174
													0.88501
													0.823975
													1.00708
													1.2207
													1.06811
													0.793457
													0.88501
													1.12915
													0.946045
													1.09863
													0.701904
													0.823975
													1.0376
													1.28174
													0.915527
													1.06811
													1.52588
													0.762939
													0.823975
													0.946045
													1.0376
													0.946045
													0.823975
													1.40381
													0.946045
													0.701904
													0.793457
													0.823975
													0.549316
													0.732422
													0.732422
													0.762939
													0.640869
													0.793457
													0.915527
													0.549316
													0.671387
													0.701904
													0.640869
													0.976562
													0.732422
													0.610352
													0.762939
													0.640869
													0.88501
													0.915527
													0.88501
													1.0376
													0.671387
													0.732422
													0.854492
													0.88501
													0.762939
													0.640869
													0.793457
													0.793457
													0.88501
													1.0376
													1.0376
													0.671387
													1.25122
													0.762939
													0.976562
													0.701904
													1.00708
													0.701904
													1.19019
													0.915527
													0.671387
													1.15967
													0.854492
													0.793457
													1.0376
													0.88501
													1.00708
													1.19019
													0.915527
													0.88501
													0.762939
													1.15967
													0.946045
													0.640869
													0.88501
													0.701904
													1.09863
													0.915527
													1.00708
													0.854492
													0.701904
													1.00708
													1.0376
													1.19019
													1.0376
													1.2207
													1.00708
													0.915527
													0.915527
													1.34277
													0.762939
													1.15967
													0.823975
													0.671387
													1.0376
													1.2207
													1.06811
													0.762939
													0.854492
													0.946045
													0.915527
													0.854492
													0.549316
													0.701904
													0.976562
													1.09863
													0.701904
													1.19019
													0.732422
													0.946045
													0.610352
													1.09863
													1.00708
													1.0376
													0.854492
													0.976562
													0.732422
													0.854492
													0.701904
													0.762939
													0.88501
													1.0376
													0.946045
													0.732422
													1.12915
													1.15967
													1.00708
													0.946045
													0.793457
													1.40381
													0.976562
													0.976562
													1.2207
													0.701904
													0.610352
													0.823975
													0.823975
													0.762939
													0.915527
													1.15967
													0.854492
													0.976562
													0.915527
													1.06811
													0.854492
													1.00708
													0.88501
													1.2207
													0.793457
													0.640869
													1.37329
													0.549316
													1.09863
													0.854492
													0.915527
													0.762939
													0.579834
													0.610352
													0.732422
													1.2207
													0.793457
													0.732422
													1.00708
													0.762939
													1.25122
													0.762939
													0.946045
													0.671387
													0.701904
													0.732422
													1.34277
													1.34277
													1.00708
													1.06811
													0.823975
													1.34277
													1.2207
													1.09863
													1.31226
													1.12915
													1.25122
													0.701904
													0.854492
													0.915527
													0.915527
													1.19019
													0.701904
													0.732422
													0.701904
													0.88501
													1.00708
													0.823975
													0.701904
													0.915527
													1.06811
													0.976562
													0.732422
													0.793457
													0.823975
													0.854492
													0.671387
													0.610352
													0.549316
													1.0376
													0.640869
													0.823975
													0.762939
													0.823975
													0.701904
													1.06811
													0.732422
													0.671387
													1.09863
													0.762939
													0.915527
													1.06811
													0.732422
													0.946045
													1.49536
													0.915527
													0.976562
													0.823975
													0.976562
													0.946045
													0.762939
													0.732422
													0.762939
													0.610352
													1.06811
