# Supplementary material for: Reactive oxygen species regulate activity-dependent neuronal plasticity in Drosophila
Source: eLife journal article supplement (doi:10.7554/elife.39393), 2018-12-12
Supplement: supp [file elife-39393-supp-v1.zip › elife_poa_e39393_Figure_6_source_data_1.xlsx]

## Sheet: Sheet1
	Figure 1 Panel A (Crawling Speed Quantification)									Figure 1 Panel B (Crawling Speed Quantification)								Figure 1 Panel C (Crawling Speed Quantification)
										Control = dvGlut-GAL4 / +								Control = dvGlut-GAL4 / +
										UAS-dTrpA1 = dvGlut-GAL4 / UAS-dTrpA1								UAS-DJ1bC104A = dvGlut-GAL4 / UAS-DJ1bc104A
Rearing Temperature °C	25	25	25	29	32	29	32			27		27						25	25	32	32	29	29	32	32
Crawling Temperature °C	25	29	32	29	32	25	25			22		22						25	25	32	32	25	25	25	25
Genotype	OregonR	OregonR	OregonR	OregonR	OregonR	OregonR	OregonR			Control		UAS-dTrpA1						Control	UAS-DJ1bC104A	Control	UAS-DJ1bC104A	Control	UAS-DJ1bC104A	Control	UAS-DJ1bC104A
	0.482007	0.901934	0.775318	0.61625	0.810733	0.429946	0.502205			0.393018		0.217599						0.828571	0.467222	0.68906	0.801374	0.493509	0.514389	0.464613	0.700833
	0.491911	0.746259	0.880879	0.695199	0.725295	0.636399	0.424593			0.562154		0.202921						0.722364	0.52354	0.619804	0.758462	0.558628	0.588722	0.68988	0.656204
	0.710669	1.03599	0.533759	0.696	0.864727	0.402276	0.556973			0.614118		0.273631						0.67098	0.58	0.677753	1.03359	0.539894	0.557476	0.467463	0.582929
	0.703827	0.856399	0.853052	0.707097	0.974286	0.437544	0.402886			0.38039		0.270904						0.799378	0.548649	0.611473	0.638307	0.500684	0.425665	0.592266	0.720735
	0.890545	1.02945	0.748727	0.620554	0.733946	0.437448	0.626633			0.443529		0.235505						0.865606	0.444667	0.553184	0.750133	0.309095	0.666491	0.544911	0.541758
	0.710985	0.797839	0.89552	0.350465	0.897556	0.608194	0.505161			0.483926		0.207305						0.653651	0.609935	0.697256	0.715333	0.523689	0.486409	0.526558	0.57642
	0.745343	0.914973	0.72556	0.610017	0.916683	0.62964	0.358344			0.382197		0.294988						0.525794	0.932143	0.669399	0.773333	0.528079	0.594872	0.19661	0.446631
	0.583021	0.631786	0.625545	0.576174	0.553486	0.442518	0.371056			0.394046		0.2124						0.864679	0.826061	0.694792	0.767697	0.401857	0.610298	0.670272	0.777447
	0.82708	1.08777	0.680744	0.812	0.677034	0.607085	0.567875			0.3625		0.154128						0.788273	0.5104	0.639706	0.721778	0.669371	0.640549	0.461916	0.79828
	0.656592	0.646164	0.75632	0.398999	0.543144	0.380872	0.578362			0.551		0.258564						0.699412	0.570794	0.650422	0.691807	0.460145	0.536416	0.536126	0.791826
	0.74247	0.989857	0.783728	0.66859	0.930636	0.587716	0.440929			0.389916		0.274461						0.633814	0.52925	0.704286	0.975659	0.483064	0.644026	0.607808	0.686531
	0.842677	0.82779	0.823662	0.664517	0.842685	0.41073	0.451415			0.517857		0.254869						0.781224	0.592747	0.56229	0.597576	0.480186	0.608561	0.629548	0.457778
	0.597143	0.71273	0.78747	0.578264	0.821872	0.58	0.448265			0.424215		0.219989						0.793235	0.467013	0.60494	0.793235	0.357594	0.552986	0.565043	0.812
	0.738783	0.741451	0.918859	0.617523	0.64995	0.581522	0.452743			0.326667		0.261759						0.814468	0.746596	0.586692	0.892222	0.532235	0.696975	0.442392	0.560955
	0.653746	0.858598	0.616545	0.653186	0.749438	0.409515	0.435784			0.58		0.240752						0.80366	0.915312	0.68264	1.00647	0.490494	0.477215	0.52806	0.780769
	0.44796	0.725801	0.701248	0.795258	0.569948	0.414536	0.655455			0.456596		0.208487						0.857815	0.505161	0.591373	1.05528	0.459756	0.545882	0.562226	0.743765
	0.648777	1.17851	0.74	0.402795	0.75727	0.616527	0.40524			0.385986		0.305386						0.49285	0.947805	0.734189	0.794815	0.436933	0.509268	0.588529	0.706466
	0.417518	0.911667	0.887885	0.623345	0.73847	0.359709	0.428035			0.560227		0.169746						0.540274	0.574423	0.636432	0.934026	0.680338	0.6264	0.443878	0.787861
	0.66894	0.930373	0.58	0.522892	0.529956	0.54449	0.68755			0.618819		0.287439						0.744248	0.703285	0.595747	0.77156	0.502195	0.509639	0.434372	0.668871
	0.508928	0.706682	0.757638	0.47	0.819464	0.526839	0.565679			0.480215		0.200174						0.682689	0.676667	0.540162	0.924176	0.436605	0.642534	0.476889	0.452807
	0.641653	0.667913	0.711537	0.541333	0.869454	0.586718	0.667962			0.472286		0.105349						0.80497	0.474546	0.713172	0.888511	0.439191	0.638784	0.447513	0.411535
	0.590382	0.61943	0.743888	0.800769	0.845817	0.62	0.592288			0.516777		0.219206						0.68726	0.50209	0.791411	0.85265	0.440142	0.662269	0.588889	0.71456
	0.854482	0.975548	0.660149	0.651581	0.826993	0.458605	0.406			0.369855		0.214039						0.698148	0.908054	0.623899	0.777447	0.590311	0.426736	0.620154	0.61437
	0.539874	0.702964	0.799312	0.578994	0.801277	0.695416	0.489732			0.610367		0.164962						0.505092	1.015	0.790047	0.772604	0.584496	0.654359	0.453125	0.608293
	0.623108	0.828307	0.787143	0.391025	0.843636	0.535887	0.50958			0.365766		0.0994744						0.73037	0.718095	0.64533	0.820986	0.646497	0.612676	0.348906	0.419851
	0.783936	0.84427	0.775825	0.653903	0.601956	0.518588	0.54512			0.37076		0.129618						0.677405	0.759594	0.694098	0.671743	0.615034	0.665474	0.5858	0.743913
	0.5751	0.693895	0.803145	0.938938	0.620739	0.56161	0.407641			0.460588		0.0832617						0.759524	0.715068	0.893156	0.878208	0.643437	0.690476	0.392353	0.738029
	0.663559	0.831967	0.907109	0.752929	0.737483	0.523018	0.377744			0.450425		0.0946296						0.772	0.69565	0.757954	0.756762	0.258952	0.58	0.565176	0.551845
	0.68875	0.746068	0.712964	0.617371	0.839474	0.774918	0.348			0.333528		0.11351						0.806394	0.719351	0.752034	1.0674	0.814096	0.654525	0.468	0.653109
	0.84	0.906667	0.840283	0.833612	0.602634	0.485247	0.443029			0.448297		0.0992675						0.71113	0.790909	0.723788	0.830454	0.626075	0.722264	0.763316	0.615583
	0.576638	0.60692	0.865986	0.87141	0.718152	0.64198	0.494295			0.585631		0.0987145						0.741009	0.70518	1.04013	1.00931	0.727819	0.638433	0.565738	0.727042
	0.607389	1.04078	0.621716	0.734513	0.734342	0.665178	0.524859			0.573696		0.102049						0.592083	0.713846	0.631632	0.999575	0.54717	0.618411	0.655933	0.58
	0.740769	0.917269	0.821039	0.660967	0.921317	0.426228	0.468276			0.328081		0.229505						0.585577	0.646622	0.947171	0.788263	0.721244	0.675755	0.51475	0.735741
	0.524703	0.72924	0.505413	0.59341	0.6177	0.600893	0.241431			0.412774		0.111831						0.475181	0.76125	0.812646	0.599661	0.654839	0.746907	0.45418	0.7
	0.739618	0.521743	0.819096	0.640611	0.550365	0.708289	0.304373			0.404946		0.307378						0.693333	0.655952	0.740379	0.838416	0.538938	0.6206	0.56746	0.733529
	0.593182	0.659806	0.841948	0.674509	0.715203	0.428634	0.375595					0.293834						0.883385	0.432542	0.64226	0.949855	0.728718	0.646368	0.712079	0.690373
	0.656776	0.740295	0.718	0.658237	0.609511	0.266984	0.356685					0.260782						0.568627	0.745714	0.759281	1.04041	0.523466	0.516	0.499304	0.5481
	0.772261	0.743042	0.695244	0.655733	0.475897	0.434903	0.574693					0.297119						0.593488	0.757222	0.651228	0.792984	0.646923	0.687077	0.522339	0.6
	0.596437	0.81281	0.677157	0.609252	0.309515	0.385093	0.159413					0.299897						0.922727	0.56766	0.798739	0.902511	0.453983	0.617593	0.544404	0.660478
	0.784706	0.642007	0.50465	0.795912	0.522	0.652194	0.403907					0.217822						0.710045	0.664878	0.774839	0.854737	0.510062	0.82421	0.632295	0.630655
	0.626209	0.723771	0.606478	0.558343	0.650889	0.663118	0.301001					0.229456						0.77769	0.821667	0.68895	0.76125	0.219065	0.662857	0.743224	0.720072
	0.73307	0.62287	0.783271	0.49785	0.714369	0.420248	0.377817					0.328781						0.900688	0.795161	0.8584	0.915209	0.623065	0.683366	0.72855	0.739216
	0.545279	0.889624	0.544198	0.58426	0.800673	0.621102	0.445741					0.215761						0.446885	0.841569	0.662404	1.00796	0.669102	0.742548	0.645798	0.474263
	0.779467	0.584557	0.857195	0.753591	0.438537	0.591208	0.740547					0.325395						0.888316	0.881837	0.728021	1.13205	0.55495	0.751238	0.582447	0.563052
	0.801656	0.636104	0.595216	0.553636	0.457993	0.516037	0.613591					0.287643						0.673944	0.73037	1.02826	0.889892	0.421715	0.707193	0.40965	0.591757
	0.668933	0.779322	0.607472	0.703816	0.536241	0.542229	0.488889					0.247369						0.675555	0.966667	0.667547	0.75802	0.14584	0.620804	0.518225	0.586138
	0.749147	0.734667	0.670579	0.64189	0.55703	0.408251	0.505333					0.222916						0.914797	0.591837	0.691538	0.87	0.522	0.637071	0.596771	0.752015
	0.730042	0.578037	0.6049	0.95631	0.744966	0.644616	0.638296					0.307344						0.653333	0.495806	0.59407	0.876042	0.501267	0.706755	0.63937	0.513333
	0.552573	0.752863	0.862143	0.811031	0.758721	0.59452	0.466829					0.377242						0.662857	0.696	0.658581	0.871518	0.574528	0.498159	0.64008	0.656316
	0.436471	0.800468	0.75807	0.508493	0.610796	0.24895	0.42224					0.276108						0.7269	0.619322	0.823226	0.681864	0.525625	0.476038	0.671579	0.54375
	0.542517		1.06347	1.04472	0.486849	0.712571	0.385516					0.235087						1.01441	0.741861	0.715606	1.01317	0.585321	0.575857	0.506427	0.707007
	0.623957		0.964885	0.845987	0.682353	0.598954	0.428889					0.363769						0.776786	0.96921	0.75	0.899172		0.503196	0.586988	0.58
	0.742151		0.926407	0.73983	0.818139	0.523993	0.349808					0.26034						0.760575	0.804091	0.945978	0.9017		0.549563	0.715401	0.449369
	0.730326		1.03878	0.860523	0.633679	0.570584	0.589561					0.245244						0.582427	0.599016	0.464476	0.859259		0.605495	0.427405	0.68366
	0.678723		0.89276	0.684598	0.605072	0.572304	0.513714					0.325478						0.781306	0.656765	0.604438	0.777727		0.660132	0.547459	0.502844
	0.601482		0.805921	0.818456	0.773867	0.833407	0.652722					0.278623						0.690476	0.750947	0.493086	0.962346		0.70756	0.518133	0.604089
	0.532269		0.854324	0.739309	0.458889	0.622243	0.359157					0.249948						0.764452	0.690882	0.754467	0.929398		0.589243	0.752532	0.488421
	0.462389		1.10516	0.927469	0.558203	0.576673	0.529653					0.267755						0.792911	0.429041	0.790201	0.73881		0.606364	0.668567	0.551261
			0.914057	0.66213	0.44561	0.485606	0.352127					0.221569						0.648235	0.639794	0.778006	0.955294		0.443529	0.539743	0.576995
			0.965496	0.548714	0.58	0.562331	0.367549											0.796911	0.59381	0.544967	0.998755		0.501033	0.717029	0.673214
			0.793829	0.628876	1.03119	0.463074	0.191853											0.701125	0.60175	0.467887	0.807075		0.66	0.50417	0.590989
			1.21185	0.71465	0.769899	0.817816	0.353129											0.672064	0.862927	0.703798	1.00353		0.58	0.297005	0.468588
			0.957617	0.834691	0.575226	0.522312	0.24173											0.667879	0.690476	0.886338	0.831805		0.594321	0.611579	0.689275
			0.79688	0.523123	1.06248	0.471111	0.326035											0.685039	0.731006	0.607537	0.937143		0.528214	0.396778	0.58
			0.860492	0.805724	0.856783		0.309507											0.793333	0.738182	0.700698	1.056		0.576931	0.505462	0.674054
			0.88817	0.653766	0.619367														0.702385	0.658614	0.996993		0.548281	0.660555	0.675224
			0.820499	0.950308	0.889478														0.760656	0.712976	0.78517		0.551569	0.515556	0.520513
			0.729691		0.61551														0.654839	0.469524	0.987568		0.58	0.643043
			0.607543		0.72022														0.79979	0.924068	0.780219		0.4785	0.646442
			0.670794		0.737972														0.836104	0.731111	0.853298		0.559347	0.562179
			0.806112		0.717178														0.689895	0.518678	0.851087		0.601056	0.466168
			0.910103		0.84758														0.766942	0.837113	0.741861		0.51366	0.665819
			0.87		1.03861														0.789444	0.638866	1.05229		0.647985	0.671272
			0.8463		0.668813														0.689109	0.720075	0.976098		0.470656	0.5357
					0.780364														0.711631	0.504778	1.04077		0.631786	0.396842
					0.797083														0.692101	0.527419	1.03678		0.697446	0.680025
					0.900083														0.838994	0.508678	0.994286		0.671579	0.458116
					0.460359														0.653885		0.863556		0.574775	0.547449
					0.842735														0.801105					0.664079
					0.858944														0.773709					0.613993
					1.02795														0.76125					0.601402
					0.619101														0.653818					0.626543
					0.7424														0.836857					0.493861
					0.88442														0.866329					0.598031
					0.644038														0.654186
					0.392113														0.78099
					0.775976														0.625049
					0.899804														0.701974
					0.85185														0.829346
