# Supplementary figures and images for: Reactive oxygen species regulate activity-dependent neuronal plasticity in Drosophila
Source: eLife journal article supplement (doi:10.7554/elife.39393), 2018-12-12

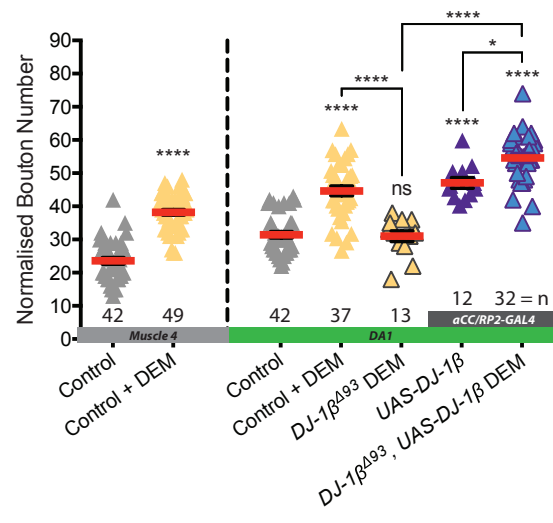

Supplement: supp [file elife-39393-supp-v1.zip]

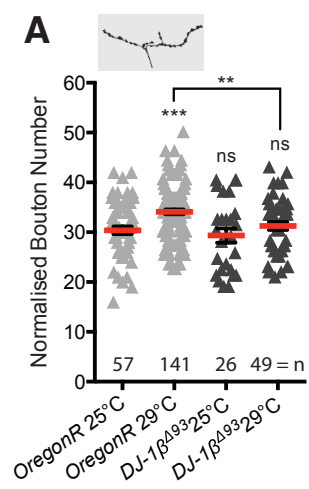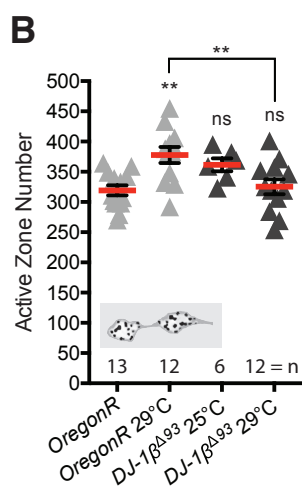

Supplement: supp [file elife-39393-supp-v1.zip]

*OregonR*

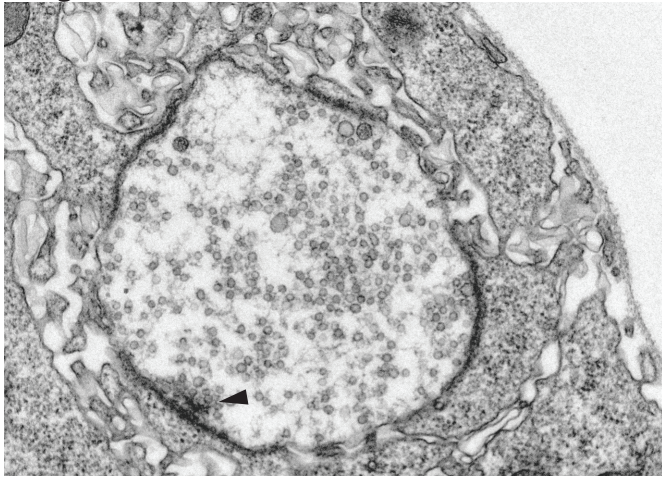

*DJ-1 $\beta^{\Delta 93}$*

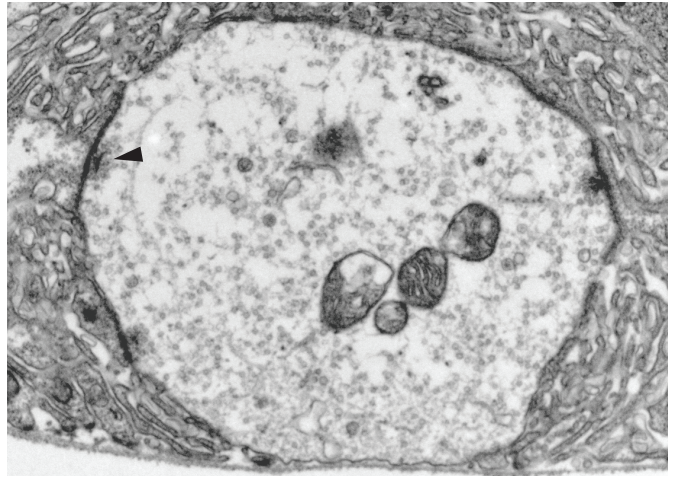

500nm

Supplement: supp [file elife-39393-supp-v1.zip › elife_poa_e39393_Figure_3_figure_supplement_1.pdf]
